# Supplementary material
Source: PubMed Central journal article supplement (PMC2596294)
Supplement: 438_2008_376_MOESM1_ESM.pdf [file 438_2008_376_MOESM1_ESM.pdf]

**Supplementary Figure S1.** Alignment of sequences including intron and surrounding regions from the population of *Ogre* elements in *Medicago truncatula* used for the design of primers specific for each subfamily (MT4 – MT1). Subfamilies are separated with lines, donor and acceptor splice sites are shaded in grey. Orange boxes – forward and reverse primers for MT1, green boxes – MT2, blue boxes – MT3, yellow boxes – MT4.

**MT4** CT573400.6 ACTGTGAGTGGCGAGTCCAGCTTTTATGATCAGCAATTTGTCTCGCTTTCTCTGTTCATTGGTGGTAGTAGTTCAGATGGGTCGTCATTCCAA  
AC146664.33 ACCTGTGAGTGGCGAATCGGCCTTTTAAATCAGCAATTTGTCTGCTTTCTCTGTTATCGGTGGTAGGGTTCAGACGGGCCATCATTTCCAA  
AC146590.25 ACCTGTGAGTGGCGAGTCCGCCTTTTAAATCAGCAATTTGTCTGCTTTCTCTGTTATCGGTGGTAGGGTTCAGACGGGCCATCATTTCCAA  
AC145061.27 ACCTGTGAGTGGCGAGTCCGCCTTTTAAATCAGCAATTTGTCTGCTTTCTCTGTTATCGGTGGTAGGGTTCAGACGGGCCATCATTTCCAA  
AC135311.13 ACCTGTGAGTGGCGAATCGGCCTTTTAAATCAGCAATTTGTCTGCTTTCTCTGTTATCGGTGGTAGGGTTCAGACGGGCCATCATTTCCAA  
**MT3** AC151524.2 ACAGTAAGTGGGAAATCAGCTTTTGGTTAGCCATTTGTCTGCTTTCTCTTTCATTGGTGGTAAAGTTCGGATGGAACGCTCATTTCCAA  
AC149496.23 ACAGTAAGTGGGAAATCAGCTTTTGGTTAGCCATTTGTCTGCTTTCTCTTTCATTGGTGGTAAAGTTCGGATGGAACGCTCATTTCCAA  
AC147001.42 ACAGTAAGTGGGAAATCAGCTTTTGGTTAGCCATTTGTCTGCTTTCTCTTTCATTGGTGGTAAAGTTCGGATGGAACGCTCATTTCCAA  
AC144591.10 ACCTGTGAATGGTGAAGAGGCTTTGTTAGTGAGCCATTTGTCTGCTTTCTCTTTCATTGGGCTGACAGTGTGAAGGGACGCCTTTTCAG  
AC138465.22 ACAGTAAGTGGGAAATCAGCTCTGTTGGTTAGCCATTTGTCTGCTTTCTCTTTCATTGGTGGTAAAGTTCGGATGGAACGCTCATTTCCAA  
**MT2** CR936328.1 ACCTGTAAACCGGTGAAGAGGCTTTATTGGTGGTATTTGTCTATCTTTCTCTTTCATTGGGCGAGACGATGTCGAAGGGACACCTTTTCAA  
CR932960.3 ACCTGTAAACCGGTGAAGAGGCTTTATTGGTGGTATTTGTCTATCTTTCTCTTTCATTGGGCGAGACGATGTCGAAGGGACACCTTTTCAA  
AC157980.14 ACCTGTAAACCGGTGAAGAGGCTTTATTGGTGGTATTTGTCTATCTTTCTCTTTCATTGGGCGAGACGATGTCGAAGGGACACCTTTTCAA  
AC151742.9 ACCTGTAAACCGGTGAAGAGGCTTTATTGGTGGTATTTGTCTATCTTTCTCTTTCATTGGGCGAGACGATGTCGAAGGGACACCTTTTCAA  
AC148171.16 ACCTGTAAACCGGTGAAGAGGCTTTATTGGTGGTATTTGTCTATCTTTCTCTTTCATTGGGCGAGACGATGTCGAAGGGACACCTTTTCAA  
AC146971.16 ACCTGTAAACCGGTGAAGAGGCTTTATTGGTGGTATTTGTCTATCTTTCTCTTTCATTGGGCGAGACGATGTCGAAGGGACACCTTTTCAA  
AC146856.8 ACCTGTAAACCGGTGAAGAGGCTTTATTGGTGGTATTTGTCTATCTTTCTCTTTCATTGGGCGAGACGATGTCGAAGGGACACCTTTTCAA  
AC146789.30 ACCTGTAAACCGGTGAAGAGGCTTTATTGGTGGTATTTGTCTATCTTTCTCTTTCATTGGGCGAGACGATGTCGAAGGGACACCTTTTCAA  
AC144656.12 ACCTGTGAATGGTGAAGAGGCTTTGTTAGTGAGCCATTTGTCTGCTTTCTCTTTCATTGGGCTGATAGTGTGAAGGGACGCCTTTTCAG  
AC144345.18 ACCTGTAAACCGGTGAAGAGGCTTTATTGGTGGTATTTGTCTATCTTTCTCTTTCATTGGGCGAGACGATGTCGAAGGGACACCTTTTCAA  
AC130806.58 ACCTGTAAACCGGTGAAGAGGCTTTATTGGTGGTATTTGTCTATCTTTCTCTTTCATTGGGCGAGACGATGTCGAAGGGACACCTTTTCAA  
AC129090.22 ACCTGTGAATGGTGAAGAGGCTTTGTTAGTAAGCCATTTGTCTGCTTTCTCTTTCATTGGGCGATAGTGTGAAGGGACGCCTTTTCAG  
**MT1** CR962135.1 ACCATTTCATGGAGGGAAGCATACTTGGTTAGCCAGTATCACTTTCTCTTTCATTAGAAAGCAGGGTCTGCAGAGGGGACCGCTTTTCAA  
CR962122.2 ACCATTTCATGGAGGAGGCATACCTGGTTAGCCAGTATCACTTTCTCTTTCATTAGAAAGCAGGGTCTGCAGAGGGGACCGCTTTTCAA  
CR936945.2 ACAATCCATGGTGAAGAAGCATACTTAGTCAGCCAGTTGTCTTCTTTTCTTGTGTTGAAGCAGGGTCTGCTGAAGGGACTGCTTTCCAA  
CR932962.2 ACAATCCATGGTGAAGAAGCATACTTAGTCAGCCAGTTGTCTTCTTTTCTTGTGTTGAAGCAGGGTCTGCTGAAGGGACTGCTTTCCAA  
CR932959.2 ACAATCCATGGTGAAGAAGCATACTTAGTCAGCCAGTTGTCTTCTTTTCTTGTGTTGAAGCAGGGTCTGCTGAAGGGACTGCTTTCCAA  
CR931743.1 ACCATTTCATGGAGGAAGCATACTTGGTTCAGCCAGTATCACTTTCTCTTTCATTAGAAAGCAGGGTCTGCAGAGGGGACCGCTTTTCAA  
CR931740.2 ACCATTTCATGGAGGAAGCATACTTGGTTCAGCCAGTATCACTTTCTCTTTCATTAGAAAGCAGGGTCTGCTGAAGGGACTGCTTTCCAA  
CR954230.1 ACCATTTCATGGAGGAAGCATACTTAGTCAGCCAGTGTCTTCTTTTCTTGTGTTGAAGCAGGGTCTGCTGAAGGGACTGCTTTCCAA  
CT573505.1 ACCGTTTCATGGAGGAAGCATACTTAGTCAGCCAGTGTCTTCTTTTCTTGTGTTGAAGCAGGGTCTGCTGAAGGGACTGCTTTCCAA  
CT030245.8 ACAATCCATGGTGAAGAAGCATACTTAGTCAGCCAGTTGTCTTCTTTTCTTGTGTTGAAGCAGGGTCTGCTGAAGGGACTGCTTTCCAG  
CT025840.2 -----  
CT010518.7 ACAATCCATGGTGAAGAAGCATACTTAGTCAGCCAGTGTACTTCTTTCTTGTGTTGAAGCAGGGTCTGCTGAAGGGACTGCTTTCCAA  
CT009749.1 ACAATCCATGGTGAAGAAGCATACTTAGTCAGCCAGTGTCTTCTTTTCTTGTGTTGAAGCAGGGTCTGCTGAAGGGACTGCTTTCCAA  
CT009565.10 ACCGTTTCATGGAGGAAGCATACTTAGTCAGCCAGTGTCTTCTTTTCTTGTGTTGAAGCAGGGTCTGCTGAAGGGACTGCTTTCCAA  
CT009528.9 ACCATTTCATGGTGAAGAAGCATACTTAGTCAGCCAGTATCTTCTTTTCTTGTGTTGAAGCAGGGTCTGCTGAAGGGACTGCTTTCCAA  
CT009511.9 ACAATCCATGGTGAAGAAGCATACTTAGTCAGCCAGTTGTCTTCTTTTCTTGTGTTGAAGCAGGGTCTGCTGAAGGGACTGCTTTCCAA  
AC174468.2 ACCATTTCATGGTGAAGAAGCATACTTAGTCAGCCAGTATCTTCTTTTCTTGTGTTGAAGCAGGGTCTGCTGAAGGGACTGCTTTCCAA  
AC174378.9 ACCATTTCATGGAGGGAAGCATACTGGTTAGCCAGTATCACTTTCTCTTTCATTAGAAAGCAGGGTCTGCAGAGGGGACCGCTTTTCAA  
AC169177.4 ACCATTTCATGGAGGGAAGCATACTGGTTAGCCAGTATCACTTTCTCTTTCATTAGAGGTTAGGGTCTGCAGAGGGGACCGCTTTTCAA  
AC162277.25 ACAATCCATGGTGAAGAAGCATACTTAGTCAGCCAGTGTCTTCTTTTCTTGTGTTGAAGCAGGGTCTGCTGAAGGGACTGCTTTCCAA  
AC159185.11 ACAATCCATGGTGAAGAAGCATACTTAGTCAGCCAGTTGTCTTCTTTTCTTGTGTTGAAGCAGGGTCTGCTGAAGGGACTGCTTTCCAA  
AC156629.26 ACAATCCATGGTGAAGAAGCATACTTAGTCAGCCAGTTGTCTTCTTTTCTTGTGTTGAAGCAGGGTCTGCTGAAGGGACTGCTTTCCAA  
AC155891.2 ACAGTCCATGGAGGAAGAGCATACTTGGTTAGCCAGTGTCTTCTTTTCTTGTGTTGAAGCAGGGTCTGCTGAAGGGACTGCTTTCAA  
AC155100.17 ACCATTTCATGGAGGAAGCATACTGGTTAGCCAGTATCACTTTCTCTTTCATTAGAAAGCAGGGTCTGCAGAGGGGACCGCTTTTCAA  
AC151822.29 ACCATTTCATGGAGGGAAGCATACTGGTTAGCCAGTATCACTTTCTCTTTCATTAGAGGCGGGTCTGCAGAGGGGACCGCTTTTCAA  
AC151725.26 ACCATTTCATGGAGGAAGAGCATACTGGTTAGCCAGTATCACTTTCTCTTTCATTAGAGGCGGGTCTGCAGAGGGGACCGCTTTTCAA  
AC151673.24 ACAATCCATGGTGAAGAAGCATACTTAGTCAGCCAGTATCTTCTTTTCTTGTGTTGAAGCAGGGTCTGCTGAAGGGACTGCTTTCCAA  
AC151459.30 ACCATTTCATGGTGAAGAAGCATACTTAGTCAGCCAGTGTCTTCTTTTCTTGTGTTGAAGCAGGGTCTGCTGAAGGGACTGCTTTCCAA  
AC150445.24 ACAATCCATGGTGAAGAAGCATACTTAGTCAGCCAGTTGTCTTCTTTTCTTGTGTTGAAGCAGGGTCTACTGAAGGGACTGCTTTCCAA  
AC149496.23 ACAATCCATGGTGAAGAAGCATACTTAGTCAGCCAGTTGTCTTCTTTTCTTGTGTTGAAGCAGGGTCTGCAGAGGGGACCGCTTTCCAA  
AC149040.2 ACCATTTCATGGAGGGAAGCATACTGGTTAGCCAGTATCACTTTCTCTTTCATTAGAAAGCAGGGTCTGCAGAGGGGACCGCTTTTCAA  
AC149040.2 ACAATCCATGGTGAAGAAGCATACTTAGTCAGCCAGTTGTCTTCTTTTCTTGTGTTGAAGCAGGGTCTGCTGAAGGGACTGCTTTCCAA  
AC146709.11 ACAATCCATGGTGAAGAAGCATACTTAGTCAGCCAGTTGTCTTCTTTTCTTGTGTTGAAGCAGGGTCTGCTGAAGGGACTGCTTTCCAA  
AC145512.33 ACAATTCACCGGTGAAGAAGCATACTTAGTCAGCCAGTTGTCTTCTTTTCTTGTGTTGAAGCAGGGTCTGCTGAAGGGACTGCTTTCCAA  
AC145061.27 ACAATCCATGGTGAAGAAGCATACTTAGTCAGCCAGTTGTCTTCTTTTCTTGTGTTGAAGCAGGGTCTGCTGAAGGGACTGCTTTCCAA  
AC144930.20 ACCATTTCATGGAGGGAAGCATACTGGTTAGCCAGTATCACTTTCTCTTTCATTAGAAAGCAGGGTCTGCAGAGGGGACCGCTTTTCAA  
AC144727.11 ACAATCCATGGTGAAGAAGCATACTTAGTCAGCCAGTTGTCTTCTTTTCTTGTGTTGAAGCAGGGTCTGCTGAAGGGACTGCTTTCCAA  
AC144727.11 ACAGTCCATGGAGGAAGAGCATACTTGGTTAGCCAGTGTCTTCTTTTCTTGTGTTGAAGCTGGATCTGCTGAAGGACTGCTTTCAA  
AC144658.33 ACCGTTTCATGGAGGAAGCATACTTAGTCAGCCAGTGTACTTCTTTTCTTGTGTTGAAGCAGGGTCTGCTGAAGGGACTGCTTTCCAA  
AC144405.29 ACAATCCATGGTGAAGAAGCATACTTAGTCAGCCAGTTGTCTTCTTTTCTTGTGTTGAAGCAGGGTCTGCTGAAGGGACTGCTTTCCAG  
AC140913.25 ACAATCCATGGTGAAGAAGCATACTTAGTCAGCCAGTTGTCTTCTTTTCTTGTGTTGAAGCAGGGTCTACTGAAGGGACTGCTTTCCAA  
AC140773.20 ACCATTTCATGGAGGGAAGCATACTGGTTAGCCAGTATCACTTTCTCTTTCATTAGAAAGCAGGGTCTGCAGAGGGGACCGCTTTTCAA  
AC140720.21 ACAATCCATGGTGAAGAAGCATACTTAGTCAGCCAGTTGTCTTCTTTTCTTGTGTTGAAGCAGGGTCTGCTGAAGGGACTGCTTTCCAA  
AC140550.31 ACAATCCATGGTGAAGAAGCATACTTAGTCAGCCAGTGTACTTCTTTTCTTGTGTTGAAGCAGGGTCTGCTGAAGGGACTGCTTTCCAA  
AC139313.11 ACAATCCATGGTGAAGAAGCATACTTAGTCAGCCAGTTGTCTTCTTTTCTTGTGTTGAAGCAGGGTCTGCTGAAGGGACTGCTTTCCAA  
AC138527.22 ACCATTTCATGGAGGGAAGCATACTGGTTAGCCAGTATCACTTTCTCTTTCATTAGAGGCGGGTCTGTAGAGGGGACCGCTTTTCAA  
AC138133.26 ACAGTCCATGGTGAAGAAGCATACTTAGTCAGCCAGTGTCTTCTTTTCTTGTGTTGAAGCAGGGTCTGCTGAAGGGACTGCTTTCCAA  
AC138012.32 ACAATCCATGGTGAAGAAGCATACTTAGTCAGCCAGTATCTTCTTTTCTTGTGTTGAAGCAGGGTCTGCTGAAGGGACTGCTTTCCAA  
AC137667.18 ACCATTTCATGGTGAAGAAGCATACTTAGTTAGCCAGTATCTTCTTTTCTTGTGTTGAAGCAGGGTCTGCTGAAGGGACTGCTTTCCAA  
AC135504.47 ACAGTCCATGGAGGAAGAGCATACTTGGTTAGCCAGTGTCTTCTTTTCTTGTGTTGAAGCTGGATCTGCTGAAGGAACTGCTTTCAA  
AC135396.32 ACAATCCATGGTGAAGAAGCATACTTAGTCAGCCAGTTGTCTTCTTTTCTTGTGTTGAAGCAGGGTCTGCTGAAGGGACTGCTTTCCAA  
AC134824.36 ACAATCCATGGTGAAGAAGCATACTTAGTCAGCCAGTTGTCTTCTTTTCTTGTGTTGAAGCAGGGTCTGCTGAAGGGACTGCTTTCCAA  
AC133864.32 ACAATCCATGGTGAAGAAGCATACTTAGTCAGCCAGTGTCTTCTTTTCTTGTGTTGAAGCAGGGTCTGCTGAAGGGACTGCTTTCCAA  
AC130802.36 ACAATCCATGGTGAAGAAGCATACTTAGTCAGCCAGTTGTCTTCTTTTCTTGTGTTGAAGCAGGGTCTGCTGAAGGGACTGCTTTCCAA  
AC127018.25 ACAATCCATGGTGAAGAAGCATACTTAGTCAGCCAGTTGTCTTCTTTTCTTGTGTTGAAGCAGGGTCTGCTGAAGGGACTGCTTTCCAA  
AC122728.32 ACAATCCATGGTGAAGAAGCATACTTAGTCAGCCAGTTGTCTTCTTTTCTTGTGTTGAAGCAGGGTCTGCTGAAGGAACTGCTTTCCAA  
AC121246.28 ACCATTTCATGGTGAAGAAGCATACTTAGTTAGCCAGTATCTTCTTTTCTTGTGTTGAAGCAGGGTCTGCTGAAGGGACTGCTTTCCAA  
AC121234.33 ACAATTCATGGAGGGAAGCATACTGGTTAACCAGTATCACTTTCTCTTTCATTAGAAAGCAGGGTCTGCAGAGGGGACCGCTTTTCAA

CT573400.6 GGGTTCTCTGCGTGAAGGA---AGCGTAAAGTAAAGATTGGGACTTGATGGCTTCGTTGAAGGACCGCACAGAGGGTAATCCAGGAGGGCAA  
AC146664.33 GGATTCTCTGCCGAAGAA---AGTGTCCGTAAGATTGAGACTTGATGGCTTCGTTGAAGGATGCTCCGGAGAGTAATTCAGGAAGGCCAAA  
AC146590.25 GGATTCTCTGCCGAAGAA---AGTGTCCGTAAGATTGAGACTTGATGGCTTCGTTGAAGGATGCTCCGGAGAGTAATTCAGGAAGGCCAAA  
AC145061.27 GGGTTCTCTGCCGAAGAA---AGTGTCCGTAAGATTGAGACTTGATGGCTTCGTTGAAGGATGCTCCGGAGAGTAATTCAGGAAGGCCAAA  
AC135311.13 GGGTTCTCTGCCGAAGAA---AGTGTCCGTAAGATTGAGACTTGATGGCTTCGTTGAAGGATGCTCCGGAGAGTAATTCAGGAAGGCCAAA  
AC151524.2 GGGTTTCCGTCGAAAGC---GGTACTACAGAGGTGAAACATGCATGGCTCTCTAAAGGATGCTCAGAGAGTAATTCAGGAAGGAAAA  
AC149496.23 GGACTTTCGTCGAAAGC---GGTACTACAGAGGTGAAACATGCATGGCTCTCTAAAGGATGCTCAGAGAGTAATTCAGGAAGGAAAA  
AC147001.42 GGGCTTTCGTCGAAAGC---GGTACTACAGAGGTGAAACATGCATGGCTCTCTAAAGGATGCTCAGAGAGTAATTCAGGAAGGAAAA  
AC144591.10 GGATTTACCCTGGAAGAAAGAGAGTACCAGAAAGTGAAGCCTCTATTTCTTCTGAAAGGATGCTCAGAAAGTGATACAAGCTGGAGGG  
AC138465.22 GGGCTTTCGTCGAAAGC---GGTACTACAGAGGTGAAACATGCATGGCTCTCTAAAGGATGCTCAGAGAGTAATTCAGGAAGGAAAG  
CR936328.1 GGGTTTACTATAGAAGATAAGAATGCCAAGAGGAAATGAAGCCTCTATCTCATCCCTAAGAGATGCTCAGAGGTCATACAAGCAGGGGGG  
CR932960.3 GGGTTTACTATAGAAGATAAGAATACCAGAGGAAATGAAGCCTCTATCTCGTCTCTGAAAGATGCTCAGAGGTCATACAAGCAGGAGGG  
AC157980.14 GGGTTTACTATAGAAGATAAGAATACCAGAGGAAATGAAGCCTCTATCTCGTCTCTGAAAGATGCTCAGAGGTCATACAAGCAGGAGGG  
AC151742.9 GGGTTTACTATAGAAGATAAGAATGCCAAGAGGAAATGAAGCCTCTATCTCATCCCTAAGAGATGCTCAGAGGTCATACAAGCAGGGGGG  
AC148171.16 GGGTTTACTATAGAAGATAAGAATACCAGAGGAAATGAAGCCTCTATCTCGTCTCTGAAAGATGCTCAGAGGTCATACAAGCAGGAGGG  
AC146971.16 GGGTTTACTATAGAAGATAAGAATACCAGAGGAAATGAAGCCTCTATCTCGTCTCTGAAAGATGCTCAGAGGTCATACAAGCAGGAGGG  
AC146856.8 GGATTTACTATAGAAGATAAGAATACCAGAGGAAATGAAGCCTCTATCTCGTCTTTAAGAGATGCTCAGAGGGTCATACAAGCAGGGGGG  
AC146789.30 GGGTTTACTATAGAAGATAAGAATACCAGAGGAAATGAAGCCTCTATCTCGTCTCTGAAAGATGCTCAGAGGTCATACAAGCAGGAGGG  
AC144656.12 GGATTTACCCTGGAAGAAAGAGAGTACCAGAAAGTGAAGCCTCTATTTCTTCTGAAAGGATGCTCAGAAAGTGATACAAGCTGGAGGG  
AC144345.18 GGGTTTACTATAGAAGATAAGAATACCAGAGGAAATGAAGCCTCTATCTCGTCTCTAAAGATGCTCAGAGGTCATACAAGCAGGGGGG  
AC130806.58 GGGTTTACTATAGAAGATAAGAATGCCAAGAGGAAATGAAGCCTCTATCTCGTCTCTGAAAGATGCTCAGAGGTCATACAAGCAGGAGGG  
AC129090.22 GGATTATCATGGAAGAAAGAGAGTACCAGAAAGTGAAGCCTCTATTTCTTCTTAAAGATGCTCAAAGTGATACAAGCTGGAGGC  
CR962135.1 GGATTAACCTGCGAAGGTACCGAGCCCAAGAGGGATGGAACCTGATGGCTTCTTTGAAGGATGCTCAGAGAGCCATCCAAGAGGGTCAA  
CR962122.2 GGATTAACCTGCGAAGGTACCGAGCCCAAGAGGGATGGAACCTGATGGCTTCTTTGAAGGATGCTCAGAGAGCCGTCCTCAAGAGGGTCAA  
CR936945.2 GGTTTGACCATTGAAGGTGTCAGAGCCTAAGGAAGCTGGGGCTGCTATGGCTTCTTTGAAGGATGCTCAGAGAGCCATCCAAGAAGGTGTCAG  
CR932962.2 GGTTTGACCATTGAAGGTGTCAGAGTCTAAGGAAGCTGGGGCTGCTATGGCTTCTTTGAAGGATGCTCAGAGAGCCATCCAAGAAGGTGTCAG  
CR932959.2 GGTTTGACCATTGAAGGTGTCAGAGTCTAAGGAAGCTGGGGCTGCTATGGCTTCTTTGAAGGATGCTCAGAGAGCCATCCAAGAAGGTGTCAG  
CR931743.1 GGATTAACCTGTTGAAATGTCAGGAGTCCAAGAGGGATGGAACCTGATGGCTTCTTTGAAGGATGCTCAGAGAGCCATCCAAGAGGGTCAA  
CR931740.2 GGTTTGACCATTGAAGGTGTCAGAGCCTAAGAAAGCTGGGGCTGCTATGCTTCAATGAAAGATGCTCGAAGGTTATCCAAGGAGGTGTCAG  
CR954230.1 GGTTTGACCATTGAAGGTGTCAGAGCCTAAGAAAGCTGGGGCTGCTATGGCTTCTTTGAAGGATGCTCAGAGAGCCATCCAAGAGGGTCAA  
CT573505.1 GGTTTGACCATTGAAGGTGTCAGAGCCTAAGAAAGCTGGGGCTGCTATGGCTTCTTTGAAGGATGCTCAGAGAGCCGTCCTCAAGAGGGTCAA  
CT030245.8 GGTTTGACCATTGAAGGTGTCAGAGTCTAAGGAAGCTGGGGCTGCTATGGCTTCTTTGAAGGATGCTCAGAGAGCCATCCAAGAAGGTGTCAG  
CT025840.2 -----AGACTCTAAGGAAGCTGGGGCTGCTATGGCTTCTTTGAAGGATGCTCAGAGAGCCATCCAAGAGGGTCAA  
CT010518.7 GGGTTTGACCATTGAAGGTGTCAGAGCCTAAGGAAGCTGGGGCTGCTATGGCTTCTTTGAAGGATGCTCAGAGAGCCATCCAAGAGGGTCAA  
CT009749.1 GGTTTGACCATTGAAGGTGTCAGAGCCTAAGGAAGCTGGGGCTGCTATGGCTTCTTTGAAGGATGCTCAGAGAGCCATCCAAGAAGGTGTCAG  
AC109565.10 GGTTTGACCATTGAAGGTGTCAGAGCCTAAGAAAGCTGGGGCTGCTATGGCTTCTTTGAAGGATGCTCAGAGAGCCATCCAAGAAGGTGTCAG  
CT009528.9 GGATTGACCATTGAAGGTGTCAGAGCCTAAGAAAGCTGGGACTGCTATGGCTTCTTTGAAGGATGCTCAGAGAGCCATCCAAGAAGGTGTCAG  
CT009511.9 GGTTTGACCATTGAAGGTGTCAGAGTCTAAGGAAGCTGGGGCTGCTATGGCTTCTTTGAAGGATGCTCAGAGAGCCATCCAAGAAGGTGTCAG  
AC174468.2 GGTTTGACCATTGAAGGTGTCAGAGCTTAAGAAAGCTGGGGCTGCTATGGCTTCTTTGAAGGATGCTCAGAGAGCCATCCAAGAGGGTCAA  
AC174378.9 GGACTAACCTGCGAAGGTACCGAGCCCAAGAGGGATGGAACCTGATGGCTTCTTTGAAGGATGCTCAGAGAGCCGTCCTCAAGAGGGTCAA  
AC169177.4 GGATTAACCTGCGAAGGTACCGAACCCTAAGAGGGATGGAACCTGATGGCTTCTTTGAAGGATGCTCAGAGAGCCGTCCTCAAGAGGGTCAA  
AC162277.25 GGTTTGACCATTGAAGGTGTCAGAGCCTAAGAAAGCTGGGGCTGCTATGGCTTCTTTGAAGGATGCTCAGAGAGCCATCCAAGAGGGTCAA  
AC159185.11 GGTTTGACCATTGAAGGTGTCAGAGTCTAAGGAAGCTGGGGCTGCTATGGCTTCTTTGAAGGATGCTCAGAGAGCCATCCAAGAAGGTGTCAG  
AC156629.26 GGTTTGACCATTGAAGGTGTCAGAGTCTAAGGAAGCTGGGGCTGCTATGGCTTCTTTGAAGGATGCTCAGAGAGCCATCCAAGAAGGTGTCAG  
AC155891.2 GGTTTGACTATTGAAGGTACCGAGCCTAAGAAAGCTGGGGCTGCTATGGCTTCTTTAAAGAGCCTTGAAGGCTGTCCTCAAGAGGAGCAG  
AC155100.17 GGATTAACCTGCGAAGGTACCGAGCCTAAGAGGGATGGAACCTGATGGCTTCTTTGAAGGATGCTCAGAGAGCCGTCCTCAAGAGGGTCAA  
AC151822.29 GGATTAACCTGCGAAGGTACCGAGCCTAAGAGGGATGGAACCTGATGGCTTCTTTGAAGGATGCTCAGAGAGCCGTCCTCAAGAGGGTCAA  
AC151725.26 GGATTAACCTGCGAAGGTACCGAGCCCAAGAGGGATGGAACCTGATGGCTTCTTTGAAGGATGCTCAGAGAGCCGTCCTCAAGAGGGTCAA  
AC151673.24 GGTTTGACCATTGAAGGTGTCAGAGCTTAAGAAAGCTGGGGCTGCTATGGCTTCTTTGAAGGATGCTCAGAGAGCCATCCAAGAGGGTCAA  
AC151459.30 GGTTTGACTATTGAAGGTACCGAGCCTAAGAAAGCTGGGGCTGCTATGGCTTCTTTGAAGGATGCTCAGAGAGCCATCCAAGAAGGTGTCAG  
AC150445.24 GGTTTGACCATTGAAGGTGTCAGAGTCTAAGGAAGCTGGGGCTGCTATGGCTTCTTTGAAGGATGCTCAGAGAGCCATCCAAGAAGGTGTCAG  
AC149496.23 GGTTTGACCATTGAAGGTGTCAGAGCCTAAGGAAGCTGGGGCTGCTATGGCTTCTTTGAAGGATGCTCAGAGAGCCATCCAAGAAGGTGTCAG  
AC149040.2 GGATTAACCTGCGAAGGTACCGAAGCCTAAGAGGGATGGAACCTGATGGCTTCTTTGAAGGATGCTCAGAGAGCCGTCCTCAAGAGGGTCAA  
AC149040.2 GGTTTGACCATTGAAGGTGTCAGAGTCTAAGGAAGCTGGGGCTGCTATGGCTTCTTTGAAGGATGCTCAGAGAGCCATCCAAGAAGGTGTCAG  
AC146709.11 GGTTTGACCATTGAAGGTGTCAGAGCCTAAGGAAGCTGGGGCTGCTATGGCTTCTTTGAAGGATGCTCAGAGAGCCATCCAAGAAGGTGTCAG  
AC145512.33 GGTTTGACCATTGAAGGTGTCAGAGTCTAAGGAAGCTGGGGCTGCTATGGCTTCTTTGAAGGATGCTCAGAGAGCCATCCAAGAAGGTGTCAG  
AC145061.27 GGTTTGACCATTGAAGGTGTCAGAGTCTAAGGAAGCTGGGGCTGCTATGGCTTCTTTGAAGGATGCTCAGAGAGCCATCCAAGAAGGTGTCAG  
AC144930.20 GGATTAACCTGCGAAGGTACCGAGCCCAAGAGGGATGGAACCTGATGGCTTCTTTGAAGGATGCTCAGAGAGCCGTCCTCAAGAGGGTCAA  
AC144727.11 GGTTTGACCATTGAAGGTGTCAGAGTCTAAGGAAGCTGGGGCTGCTATGGCTTCTTTGAAGGATGCTCAGAGAGCCATCCAAGAAGGTGTCAG  
AC144727.11 GGTTTGACTATTGAAGGTATGGAGCTCAAGAAAGCTGGGACTGCTATGGCTTCTTTAAAGAGCCTGTCAGAGGCTGTCTCAAGAAAGGACAG  
AC144658.33 GGTTTGACCATTGAAGGTGTCAGAGCCTAAGAAAGCTGGGGCTGCTATGGCTTCTTTGAAGGATGCTCAGAGAGCCATCCAAGAGGGTCAA  
AC144405.29 GGTTTGACCATTGAAGGTGTCAGAGTCTAAGGAAGCTGGGGCTGCTATGGCTTCTTTGAAGGATGCTCAGAGAGCCATCCAAGAAGGTGTCAG  
AC140913.25 GGTTTAAACCTGCGAAGGTACCGAGCCTAAGAGGGATGGAACCTGATGGCTTCTTTGAAGGATGCTCAGAGAGCCATCCAAGAAGGTGTCAG  
AC140773.20 GGATTAACCTGCGAAGGTACCGAGCCTAAGAGGGATGGAACCTGATGGCTTCTTTGAAGGATGCTCAGAGAGCCGTCCTCAAGAGGGTCAA  
AC140720.21 GGTTTGACCATTGAAGGTGTCAGAGTCTAAGAAAGCTGGGGCTGCTATGGCTTCTTTGAAGGATGCTCAGAGAGCCATCCAAGAAGGTGTCAG  
AC140550.31 GGGTTTGACCATTGAAGGTGTCAGAGCCTAAGGAAGCTGGGGCTGCTATGGCTTCTTTGAAGGATGCTCAGAGAGCCATCCAAGAAGGTGTCAG  
AC139313.11 GGTTTGACCATTGAAGGTGTCAGAGCCTAAGGAAGCTGGGGCTGCTATGGCTTCTTTGAAGGATGCTCAGAGAGCCATCCAAGAAGGTGTCAG  
AC138527.22 GGATTAACCTGCGAAGGTACCGAGCCCAAGAGGGATGGAACCTGATGGCTTCTTTGAAGGATGCTCAGAGAGCCGTCCTCAAGAGGGTCAA  
AC138133.26 GGTTTGACCATTGAAGGTGTCAGAGCCTAAGAAAGCTGGGGCTGCTATGGCTTCTTTGAAGGATGCTCAGAGAGCCATCCAAGAAGGTGTCAG  
AC138012.32 GGTTTGACCATTGAAGGTGTCAGAGTCTAAGGAAGCTGGGGCTGCTATGGCTTCTTTGAAGGATGCTCAGAGAGCCATCCAAGAAGGTGTCAG  
AC137667.18 GGTTTGACCATTGAAGGTGTCAGAGCCTAAGAAAGCTGGGACTGCTATGGCTTCTTTGAAGGATGCTCAGAGAGCCATCCAAGAAGGTGTCAG  
AC135504.47 GGTTTGACTATTGAAGGTACCGAGCCTAAGAAAGCTGGGACTGCTATGGCTTCTTTAAAGAGCCTGTCAGAGGCTGTCTCAAGAAAGGACAG  
AC135396.32 GGGTTTGACCATTGAAGGTGTCAGAGCCTAAGGAAGCTGGGGCTGCTATGGCTTCTTTGAAGGATGCTCAGAGAGCCATCCAAGAAGGTGTCAG  
AC134824.36 GGTTTGACCATTGAAGGTGTCAGAGTCTAAGGAAGCTGGGGCTGCTATGGCTTCTTTGAAGGATGCTCAGAGAGCCATCCAAGAAGGTGTCAG  
AC133864.32 GGTTTGACCATTGAAGGTGTCAGAGCCTAAGAAAGCTGGAGCTGCTATGGCTTCTTTGAAGGATGCTCAGAGAGCCGTCCTCAAGAGGGTCAA  
AC130802.36 GGTTTGACCATTGAAGGTGTCAGAGTCTAAGGAAGCTGGGGCTGCTATGGCTTCTTTGAAGGATGCTCAGAGAGCCATCCAAGAAGGTGTCAG  
AC127018.25 GGGTTTGACCATTGAAGGTGTCAGAGCCTAAGGAAGCTGGGGCTGCTATGGCTTCTTTGAAGGATGCTCAGAGAGCCATCCAAGAAGGTGTCAG  
AC122728.32 GGTTTGACCATTGAAGGTGTCAGAGTCTAAGGAAGCTGGGGCTGCTATGGCTTCTTTGAAGGATGCTCAGAGAGCCATCCAAGAAGGTGTCAG  
AC121246.28 GGATTGACCATTGAAGGTGTCAGAGCCTAAGAAAGCTGGGACTGCTATGGCTTCTTTGAAGGATGCTCAGAGAGCCATCCAAGAAGGTGTCAG  
AC121234.33 GGATTAACCTGCGAAGGTACCGAGCCCAAGAGGGAGGAACTGCAATGGCTTCTTTGAAGGATGCTCAGAGAGCCGTCCTCAAGAGGGTCAA



CT573400.6 CCTACCGAAGGCTCTTTTCGACGTGCCGGATTTCATCCATGATTGCCAGGGATCAATGCACCTACTGATGATACACCGGAA---GGAGTG  
AC146664.33 CCTACCGAAGGTTCTTTCCACAGTGTGGTTTCATTCATGATTCCACGAGACCAATGCAATTTAGATGATGCACCTGGA---GGAGTG  
AC146590.25 CCTACCGAAGGTTCTTTCCACAGTGTGGTTTCATTCATGATTCCACGAGACCAATGCAATTTAGATGATGCACCTAGA---GGAGTG  
AC145061.27 CCTACCGAAGGTTCTTTCCACAGTGTGGTTTCATTCATGATTCCGACGAGACCAATGCAATTTAGATGATGCACCTGGA---GGAGTG  
AC135311.13 CCTACCGAAGGTTCTTTCCACAGTGTGGTTTCATTCATGATTCCGACGAGACCAATGCAATTTAGATGATGCACCTGGA---GGAGTG  
AC151524.2 CCAACTAGAGGTACTTTTCACAGTGTGGATTTCATTAATGCGCCACCTGAACTAATGCAATCTGGAAGATCAATCAGAA---GAGGTG  
AC149496.23 CCAACTAGAGGTACTTTTCACAGTGTGGATTTCATTAATGCGCCACCTGAGACTAATGCAATCTGGAAGATCAATCAGAA---GAGGTG  
AC147001.42 CCAACTAGGGGTACTTTTCACAGTGTGGATTTCATTAATGCGCCCGCTGAGACTAATGCAATCTGGAAGATCAATCAGGA---GAAGTG  
AC144591.10 CCTAAAATCATGGTCAACCAATCAGAGGTTTCATAGTTCCACAGTCTGGGTTTATTTCATGCAATCATGGAAGATTAATCCGAA---AGAGTG  
AC138465.22 CCAACTAGGGGTACTTTTCACAGTGTGGATTTCATTAATGCGCCCGCTGAGACTAATGCAATCTGGAAGATCAATCAGGA---GAAGTG  
CR936328.1 GCAAAGA-----AAGGCACCTTCCACAGTTCGGGCTTTATCCATGCAATCATGGAAGATGATCCTGAA---AGTGTG  
CR932960.3 GCGAAGA-----AGGGCGCTTCCACAGTTCGGGCTTTATCCATGCAATCATGGAAGATGATCCTGAA---AGTGTG  
AC157980.14 GCGAAGA-----AGGGCGCTTCCACAGTTCGGGCTTTATCCATGCAATCATGGAAGATGATCCTGAA---AGTGTG  
AC151742.9 GCAAAGA-----AAGGCACCTTCCACAGTTCGGGCTTTATCCATGCAATCATGGAAGATGATCCTGAA---AGTGTG  
AC148171.16 GCCAAGA-----AGGGCACCTTCCACAGTTCGGGCTTTATCCATGCAATCATGGAAGATGATCCTGAA---AGTGTG  
AC146971.16 GCCAAGA-----AGGGCACCTTCCACAGTTCGGGCTTTATCCATGCAATCATGGAAGATGATCCTGAA---AGTGTG  
AC146856.8 GCAAAGA-----AGGGCACCTTCCACAGTTCGGGCTTTATCCATGCAATCATGGAAGATGATCCTGAA---AGTGTG  
AC146789.30 GCGAAGA-----AGGGCACCTTCCACAGTTCGGGCTTTATCCATGCAATCATGGAAGATGATCCTGAA---AGTGTG  
AC144656.12 ACAAAGACCGTCGTCGAGCCGATAAGGGTACTTTTCATAGTTCCACAGTCTGGGTTTATTTCATGCAATCATGGAAGATGATCCTGAA---AGTGTG  
AC144345.18 GCGAAGA-----AGGGCGCTTCCACAGTTCGGGCTTTATCCATGCAATCATGGAAGATGATCCTGAA---AGTGTG  
AC130806.58 GCAAAGA-----AGGGCACCTTCCACAGTTCGGGCTTTATCCATGCAATCATGGAAGATGATCCTGAA---AGTGTG  
AC129090.22 CCTAAGATCGTTGTCGAACCAATCAGAGTACTTCCACAGCTCTGGGTTTATTTCATGCAATCATGGAAGATTAATCCGAA---AGTGTG  
CR962135.1 -----CGGGGCACTTGTAGTGTGGGTTTGTCAACGCAATCACAGAAGAAGCAACTGGATTTGGCCCG  
CR962122.2 -----CGGGGCACTTGTAGTGTGGGTTTGTCAACGCAATCACAGAAGAAGCAACTGGATTTGGCCCG  
CR936945.2 -----CGGGAGTCTTCCACAGTTCAGGGTTTGTAAATGCTATCTCTGAAGAAGCCACTGGATCTGGTCTC  
CR932962.2 -----CGGGAGTCTTCCACAGTTCAGGGTTTGTAAATGCTATCTCTGAAGAAGCCACTGGATCTGGTCTC  
CR932959.2 -----CGGGAGTCTTCCATAGTGTAGGGTTTGTAAATGCTATCTCTGAAGAAGCCACTGGATCTGGTCTC  
CR931743.1 -----CGGGGCACTTATAGTGTGGGTTTATTAAATGCTATCTCTGAAGAAGCCACTGGATCTGGTCTC  
CR931740.2 -----CGGGAGTCTTCCACAGTTCAGGGTTTGTAAATGCTATCTCTGAAGAAGCCACTGGATCTGGTCTC  
CT954230.1 -----CAGGAGTCTTCCACAGTTCAGGGTTTGTAAATGCTATCTCTGAAGAAGCCACTGGATCTGGTCTC  
CT573505.1 -----CGGGAGTCTTCCACAGTTCAGGGTTTGTAAATGCTATCTCTGAAGAAGCCACTGGATCTGGTCTC  
CT030245.8 -----CAGGGTCTTCCACAGTTCAGGGTTTGTAAATGCTATCTCTGAAGAAGCCACTGGATCTGGTCTC  
CT025840.2 -----CAGGGTCTTCCACAGTTCAGGGTTTGTAAATGCTATCTCTGAAGAAGCCACTGGATCTGGTCTC  
CT010518.7 -----CGGGAGTCTTCCACAGTTCAGGGTTTGTAAATGCTATCTCTGAAGAAGCCACTGGATCTGGTCTC  
CT009749.1 -----CGGGAGTCTTCCACAGTTCAGGGTTTGTAAATGCTATCTCTGAAGAAGCCACTGGATCTGGTCTC  
CT009565.10 -----CAGGAGTCTTCCACAGTTCAGGGTTTGTAAATGCTATCTCTGAAGAAGCCACTGGATCTGGTCTC  
CT009528.9 -----CGGGAGTCTTCCACAGTTCAGGGTTTGTAAATGCTATCTCTGAAGAAGCCACTGGATCTGGTCTC  
CT009511.9 -----CGGGAGTCTTCCACAGTTCAGGGTTTGTAAATGCTATCTCTGAAGAAGCCACTGGATCTGGTCTC  
AC174468.2 -----CAGGAGTCTTCCACAGTTCAGGGTTTGTAAATGCTATCTCTGAAGAAGCCACTGGATCTGGTCTC  
AC174378.9 -----CGGGGCACTTATAGTGTGGGTTTGTCAACGCAATCACAGAAGAAGCAACTGGATTTGGCCCG  
AC169177.4 -----CGGGGCACTTATAGTGTGGGTTTGTCAACGCAATCACAGAAGAAGCAACTGGATTTGGCCCG  
AC162277.25 -----CGGGAGTCTTCCACAGTTCAGGGTTTGTAAATGCTATCTCTGAAGAAGCCACTGGATCTGGTCTC  
AC159185.11 -----CGGGAGTCTTCCACAGTTCAGGGTTTGTAAATGCTATCTCTGAAGAAGCCACTGGATCTGGTCTC  
AC156629.26 -----CGGGAGTCTTCCACAGTTCAGGGTTTGTAAATGCTATCTCTGAAGAAGCCACTGGATCTGGTCTC  
AC155891.2 -----CAGGAACCTTCCATAGTGTGGGTTTGTCAATGCAATTACTGAAGAAGCCACTGGATTTGGTCTC  
AC155100.17 -----CGGGGCACTTATAGTGTGGGTTTGTCAACGCAATCACAGAAGAAGCAACTGGATTTGGCCCG  
AC151822.29 -----CGGGGCACTTGTAGTGTGGGTTTGTCAACGCAATCACAGAAGAAGCAACTGGATTTGGCCCG  
AC151725.26 -----CGGGGCACTTGTAGTGTGGGTTTGTCAACGCAATCACAGAAGAAGCAACTGGATTTGGCCCG  
AC151673.24 -----CAGGAGTCTTCCACAGTTCAGGGTTTGTAAATCCTATCTCTGAAGAAGCCACTGGATCTGGTCTC  
AC151459.30 -----CGGGAGTCTTCCACAGTTCAGGGTTTGTAAATGCTATCTCTGAAGAAGCCACTGGATCTGGTCTC  
AC150445.24 -----CGGGAGTCTTCCACAGTTCAGGGTTTGTAAATGCTATCTCTAAAGAAGCCACTGGATCTGGTCTC  
AC149496.23 -----CGGGAGTCTTCCACAGTTCAGGGTTTGTAAATGCTATCTCTGAAGAAGCCACTGGATCTGGTCTC  
AC149040.2 -----CGGGGCACTTGTAGTGTGGGTTTGTCAACACAATCACAGAAGAAGCCACTGGATTTGGCCCG  
AC149040.2 -----CGGGAGTCTTCCACAGTTCAGGGTTTGTAAATGCTATCTCTGAAGAAGCCACTGGATCTGGTCTC  
AC146709.11 -----CAGGAGTCTTCCACAGTTCAGGGTTTGTAAATGCTATCTCTGAAGAAGCCACTGGATCTGGTCTC  
AC145512.33 -----CGGGAGTCTTCCACAGTTCAGGGTTTGTAAATGCTATCTCTGAAGAAGCCACTGGATCTGGTCTC  
AC145061.27 -----CGGGAGTCTTCCACAGTTCAGGGTTTGTAAATGCTATCTCTGAAGAAGCCACTGGATCTGGTCTC  
AC144930.20 -----CGGGAGTCTTCCACAGTTCAGGGTTTGTAAATGCTATCTCTGAAGAAGCCACTGGATCTGGTCTC  
AC144727.11 -----CAGGAGTCTTCCATAGTGTGGGTTTGTCAATGCAATTAACGAAGAAGCCACTGGATTTGGTCTC  
AC144727.11 -----CAGGAGTCTTCCATAGTGTGGGTTTGTCAATGCAATTAACGAAGAAGCCACTGGATTTGGTCTC  
AC144658.33 -----CGGGAGTCTTCCACAGTTCAGGGTTTGTAAATGCTATCTCTGAAGAAGCCACTGGATCTGGTCTC  
AC144405.29 -----CGGGAGTCTTCCACAGTTCAGGGTTTGTAAATGCTATCTCTGAAGAAGCCACTGGATCTGGTCTC  
AC140913.25 -----CGGGAGTCTTCCACAGTTCAGGGTTTGTAAATGCTATCTCTAAAGAAGCCACTGGATCTGGTCTC  
AC140773.20 -----CGGGGCACTTATAGTGTGGGTTTGTCAACGCAATCACAGAAGAAGCAACTGGATTTGGCTG  
AC140720.21 -----CAGGAGTCTTCCACAGTTCAGGGTTTGTAAATGCTATCTCTGAAGAAGCCACTGGATCTGGTCTC  
AC140550.31 -----CGGGAGTCTTCCACAGTTCAGGGTTTGTAAATGCTATTTCTGAAGAAGCCACTGGATCTGGTCTC  
AC139313.11 -----CGGGAGTCTTCCACAGTTCAGGGTTTGTAAATGCTATCTCTGAAGAAGCCACTGGATCTGGTCTC  
AC138527.22 -----CGGGGCACTTGTAGTGTGGGTTTGTCAACGCAATCACAGAAGAAGCAACTGGATTTGGCCCG  
AC138133.26 -----CGGGAGTCTTCCACAGTTCAGGGTTTGTAAATGCTATCTCTGAAGAAGCCACTGGATCTGGTCTC  
AC138012.32 -----CGGGAGTCTTCCACAGTTCAGGGTTTGTAAATGCTATCTCTGAAGAAGCCACTGGATCTGGTCTC  
AC137667.18 -----CGGGAGTCTTCCACAGTTCAGGGTTTGTAAATGCTATCTCTGAAGAAGCCACTGGATCTGGTCTC  
AC135504.47 -----CAGGAACCTTCTACAGTGTGGGTTTGTCAATGCAATTACTGAAGAAGCCACTGGATTTGGTCTC  
AC135396.32 -----CGGGAGTCTTCCACAGTTCAGGGTTTGTAAATGCTATCTCTGAAGAAGCCACTGGATCTGGTCTC  
AC134824.36 -----CGGGAGTCTTCCACAGTTCAGGGTTTGTAAATGCTATCTCTGAAGAAGCCACTGGATCTGGTCTC  
AC133864.32 -----CGGGAGTCTTCCACAGTTCAGGGTTTGTAAATGCTATCTCTGAAGAAGCCACTGGATCTGGTCTC  
AC130802.36 -----CGGGAGTCTTCCACAGTTCAGGGTTTGTAAATGCTATCTCTGAAGAAGCCACTGGATCTGGTCTC  
AC127018.25 -----CGGGAGTCTTCCACAGTTCAGGGTTTGTAAATGCTATCTCTGAAGAAGCCACTGGATCTGGTCTC  
AC122728.32 -----CGGGAGTCTTCCACAGTTCAGGGTTTGTAAATGCTATCTCTGAAGAAGCCACTGGATCTGGTCTC  
AC121246.28 -----CGGGAGTCTTCCACAGTTCAGGGTTTGTAAATGCTATCTCTGAAGAAGCCACTGGATCTGGTCTC  
AC121234.33 -----CGGGGCACTTATAGTGTGGGTTTCTCAACGCAATCACAGAAGAAGCAACTGGATTTGGCCCG

CT573400.6 GCACCTGTTTGGTACACCCAGGAGGAACCTGCTGCAACTGGATTGCCGTAGACATTCCTTCGTGATACCCCTTTCTAAGTAATATGTT  
AC146664.33 ACACCCGGTCTTTGTGACGCCCTGGAGGAGCTTGCTGCAACTGGATTGCTGTTGACATTCCTTCGTGACACCCCTGCTCAAGTAATGTGTT  
AC146590.25 ACACCCGGTCTTTGTGACGCCCTGGAGGAGCTTGCTGCAACTGGATTGCTGTTGACATTCCTTCGTGACACCCCTGCTCAAGTAATGTGTT  
AC145061.27 ACACCCGGTCTTTGTGACGCCCTGGAGGAGCTTGCTGCAACTGGATTGCTGTTGACATTCCTTCGTGACACCCCTGCTCAAGTAATGTGTT  
AC135311.13 ACACCCGGTATTTGTGACGCCGGGAGGAGCTTGCTGCAACTGGATTGCTGTTGACATTCCTTCGTGACACCCCTGCTGAGTAATGTGTT  
AC151524.2 GCACCTGACTTTGTGACTCCGGGTGGAACCTGCTGCAACTGGATTGCTGTTGACATTCCTTCGTGACACCCCTGCTCAAGTAATGTGTT  
AC149496.23 GCCCCTGACTTTGTAACTCCGGGTGGAACCTGCTGCAACTGGATTGCTGTTGACATTCCTTCGTGACACCCCTGCTCAAGTAATGTGTT  
AC147001.42 GCACCTGACTTTGTGACTCCGGGTGGAACCTGCTGCAACTGGATTGCTGTTGACATTCCTTCGTGACACCCCTGCTCAAGTAATGTGTT  
AC144591.10 CCACGAAACTTTGTGACACCAAGGAGGCTTAGCCACAATTGGGTTGCCGTAGATGTTCCCTTTATGCTCATTTATCTCAAGTAATGCACT  
AC138465.22 GCACCTGACTTTGTGACTCCGGGTGGAACCTGCTGCAACTGGATTGCTGTTGACATTCCTTCGTGATACCTCTTTCTAAGTAATGTGTT  
CR936328.1 CCACGAGGTTTTATAACGCCAGGAGTATCCAGCCACAATTGGGTTGCCGTAGATGTTCCCTTTGTTGCTCACTTGTCCAAGTAATGCATT  
CR932960.3 CCACGAGGTTTTATAACGCCAGGAGTATCCAGCCACAATTGGGTTGCCGTAGATGTTCCCTTTGTTGCTCACTTGTCCAAGTAATGCATT  
AC157980.14 CCACGAGGTTTTATAACGCCAGGAGTATCCAGCCACAATTGGGTTGCCGTAGATGTTCCCTTTGTTGCTCACTTGTCCAAGTAATGCATT  
AC151742.9 CCACGAGGTTTTATAACGCCAGGAGTATCCAGCCACAATTGGGTTGCCGTAGATGTTCCCTTTGTTGCTCACTTGTCCAAGTAATGCATT  
AC148171.16 CCACGAGGTTTTATAACGCCAGGAGTATCCAGCCACAATTGGGTTGCCATAGATGTTCCCTTTGTTGCTCACTTGTCCAAGTAATGCATT  
AC146971.16 CCACGAGGTTTTATAACGCCAGGAGTATCCAGCCACAATTGGGTTGCTGATAGATGTTCCCTTTGTTGCTCACTTGTCCAAGTAATGCATT  
AC146856.8 CCACGAGGTTTTATAACGCCAGGAGTATCCAGCCACAATTGGGTTGCTGATAGATGTTCCCTTTTATGCTCACTTGTCCAAGTAATGCATT  
AC146789.30 CCACGAGGTTTTATAACGCCAGGAGTATCCAGCCACAATTGGGTTGCTGATAGATGTTCCCTTTGTTGCTCACTTGTCCAAGTAATGCATT  
AC144656.12 CCACGAGGTTTTATAACGCCAGGAGTATCCAGCCACAATTGGGTTGCTGATAGATGTTCCCTTTTATGCTCATTTATCTCAAGTAATGCACT  
AC144345.18 CCACGAGGTTTTATAACGCCAGGAGTATCCAGCCACAATTGGGTTGCCGTAGATGTTCCCTTTGTTACTCACTTGTCCAAGTAATGCATT  
AC130806.58 CCACGAGGTTTTATAAATGCCAGGAGTATCCAGCCACAATTGGGTTGCTGATAGATGTTCCCTTTGTTGCTCACTTGTCCAAGTAATGCATT  
AC129090.22 CCACGAGGTTTTGTGACACAAGGAGGCTTAGCCACAATTGGGTTGCTGATAGATGTTCCCTTTATGCTCATTTATCTCAAGTAATGCACT  
CR962135.1 AGGCCGTATTTGTTACACCCAGGAGGTTTTGCAAGAGATTGGGATGCCATTGACATTCCTCAATCATGCATGTTTTCTGAGTAATATACC  
CR962122.2 AGGCCGTATTTGTTTACACCCAGGAGGCTTAGCCAGAGATTGGGATGCCATTGACATTCCTCAATCATGCATGTTTTCTGAGTAATATACC  
CR936945.2 AGGCCGTATTTGTTTACACCCAGGAGGCTTAGCCAGAAATTGGGATGCCATTGACATTCCTCAATCATGCATGTTTTCTGAGTAATGTGTC  
CR932962.2 AGGCCGTATTTGTTTACACCCAGGAGGCTTAGCCAGAGATTGGGATGCCATTGACATTCCTCAATCATGCATGTTTTCTGAGTAATGTGTC  
CR932959.2 AGGCCGTATTTGTTTACACCCAGGAGGCTTAGCCAGAGATTGGGATGCCATTGACATTCCTCAATCATGCATGTTTTCTGAGTGTGTC  
CR931743.1 AGGCCGTATTTGTTTACACCCAGGAGGCTTAGCCAGAGATTGGGATGCCATTGACATTCCTCAATCATGCATGTTTTCTGAGTAATGTGTC  
CR931740.2 AGGCCGTATTTGTTTACACCCAGGAGGCTTAGCCAGAAATTGGGATGCCATTGACATTCCTCAATCATGCATGTTTTCTGAGTAATGTGTC  
CT954230.1 AGGCCGTGATTTGTTTACACCCAGGAGGCTTAGCCAGATGATTGGGATGCCATTGACATTCCTCAATCATGCATGTTTTCTGAGTAATGTGTC  
CT573505.1 AGGCCGTGATTTGTTTACACCCAGGAGGCTTAGCCAGAGATTGGGATGCCATTGACATTCCTCAATCATGCATGTTTTCTGAGTAATGTGTC  
CT030245.8 AGACCTGCAATTTGTTTACACCCAGGAGGCTTAGCCAGAAATTGGGATGCCATTGACATTCCTCAATCATGCATGTTTTCTGAGTAATGTGTC  
CT025840.2 AGGCCGTATTTGTTTACCCAGGAGGCTTAGCCAGAGATTGGGATGCCATTGACATTCCTCAATCATGCATGTTTTCTGAGTAATGTGTC  
CT010518.7 AGGCCGTATTTGTTTACACCCAGGAGGCTTAGCCAGAGATTGGGATGCCATTGACATTCCTCAATCATGCATGTTTTCTGAGTAATGTGTC  
CT009749.1 AGGCCGTATTTGTTTACACCCAGGAGGCTTAGCCAGAGATTGGGATGCCATTGACATTCCTCAATCATGCATGTTTTCTGAGTAATGTGTC  
CT009565.10 AGGCCGTGATTTGTTTACACCCAGGAGGCTTAGCCAGAGATTGGGATGCCATTGACATTCCTCAATCATGCATGTTTTCTGAGTAATGTGTC  
CT009528.9 AGGCCGTATTTGTTTACACCCAGGAGGCTTAGCCAGAAATTGGGATGCCATTGACATTCCTCAATCATGCATGTTTTCTGAGTAATGTGTC  
CT009511.9 AGACCTGCAATTTGTTTACACCCAGGAGGCTTAGCCAGAAATTGGGATGCCATTGACATTCCTCAATCATGCATGTTTTCTGAGTAATGTGTC  
AC174468.2 AGGCCGTGATTTGTTTACACCCAGGAGGCTTAGCCAGATGATTGGGATGCCATTGACATTCCTCAATCATGCATGTTTTCTGAGTAATGTGTC  
AC174378.9 AGGCCGTATTTGTTTACACCCAGGAGGCTTAGCCAGAGATTGGGATGCCATTGACATTCCTCAATCATGCATGTTTTCTGAGTAATATACC  
AC169177.4 AGGCCGTATTTGTTTACACCCAGGAGGCTTAGCCAGAGATTGGGATGCCATTGACATTCCTCAATCATGCATGTTTTCTGAGTAATATACC  
AC162277.25 AGGCCGTGATTTGTTTACACCCAGGAGGCTTAGCCAGAGATTGGGATGCCATTGACATTCCTCAATCATGCATGTTTTCTGAGTAATGTGTC  
AC159185.11 AGGCCGTGATTTGTTTACACCCAGGAGGCTTAGCCAGAAATTGGGATGCCATTGACATTCCTCAATCATGCATGTTTTCTGAGTAATGTGTC  
AC156629.26 AGGCCGTATTTGTTTACACCCAGGAGGCTTAGCCAGAGATTGGGATGCCATTGACATTCCTCAATCATGCATGTTTTCTGAGTAATGTGTC  
AC155891.2 AGGCCGTATGTTGTTTACACCCAGGAGGCTTAGCCAGAGATTGGGATGCCATTGACATTCCTCAATCATGCATGTTTTCTGAGTGTGTC  
AC155100.17 AGGCCGTGATTTGTTTACACCCAGGAGGCTTAGCCAGAGATTGGGATGCCATTGACATTCCTCAATCATGCATGTTTTCTGAGTAATATACC  
AC151822.29 AGGCCGTGATTTGTTTACACCCAGGAGGCTTAGCCAGAGATTGGGATGCCATTGACATTCCTCAATCATGCATGTTTTCTGAGTAATATACC  
AC151725.26 AGGCCGTGATTTGTTTACACCCAGGAGGCTTAGCCAGAGATTGGGATGCCATTGACATTCCTCAATCATGCATGTTTTCTGAGTAATATACC  
AC151673.24 AGGCCGTGATTTGTTTACACCCAGGAGGCTTAGCCAGATGATTGGGATGCCATTGACATTCCTCAATCATGCATGTTTTCTGAGTAATGTGTC  
AC151459.30 AGGCCGTGATTTGTTTACACCCAGGAGGCTTAGCCAGAGATTGGGATGCCATTGACATTCCTCAATCATGCATGTTTTCTGAGTAATGTGTC  
AC150445.24 AGGCCGTATTTGTTTACCCAGGAGGCTTAGCCAGAGATTGGGATGCCATTGACATTCCTCAATCATGCATGTTTTCTGAGTAATGTGTC  
AC149496.23 AGGCCGTGATTTGTTTACACCCAGGAGGCTTAGCCAGAGATTGGGATGCCATTGACATTCCTCAATCATGCATGTTTTCTGAGTAATGTGTC  
AC149040.2 AGGCCGTGATTTGTTTACACCCAGGAGGCTTAGCCAGAGATTGGGATGCCATTGACATTCCTCAATCATGCATGTTTTCTGAGTAATATACC  
AC149040.2 AGGCCGTGATTTGTTTACACCCAGGAGGCTTAGCCAGAGATTGGGATGCCATTGACATTCCTCAATCATGCATGTTTTCTGAGTAATGTGTC  
AC146709.11 AGGCCGTGATTTGTTTACACCCAGGAGGCTTAGCCAGAGATTGGGATGCCATTGACATTCCTCAATCATGCATGTTTTCTGAGTAATGTGTC  
AC145512.33 TGGCCTGATTTGTTTACACCCAGGAGGCTTAGCCAGAGATTGGGATGCCATTGACATTCCTCAATCATGCATGTTTTCTGAGTAATGTGTC  
AC145061.27 AGGCCGTGATTTGTTTACACCCAGGAGGCTTAGCCAGAAATTGGGATGCCATTGACATTCCTCAATCATGCATGTTTTCTGAGTAATGTGTC  
AC144930.20 AGGCCGTGATTTGTTTACACCCAGGAGGCTTAGCCAGAGATTGGGATGCCATTGACATTCCTCAATCATGCATGTTTTCTGAGTAATATACC  
AC144727.11 AGGCCGTGATTTGTTTACACCCAGGAGGCTTAGCCAGAGATTGGGATGCCATTGACATTCCTCAATCATGCATGTTTTCTGAGTAATGTGTC  
AC144727.11 AGGCCGTGATTTGTTTACACCCAGGAGGCTTAGCCAGAGATTGGGATGCCATTGACATTCCTCAATCATGCATGTTTTCTGAGTAATGTGTC  
AC144658.33 AGGCCGTGTTTGTGTTTACACCCAGGAGGCTTAGCCAGAGATTGGGATGCCATTGACATTCCTCAATCATGCATGTTTTCTGAGTAATATACC  
AC144405.29 AGGCCGTGATTTGTTTACACCCAGGAGGCTTAGCCAGAAATTGGGATGCCATTGACATTCCTCAATCATGCATGTTTTCTGAGTAATGTGTC  
AC140913.25 AGGCCGTGATTTGTTTACCCAGGAGGCTTAGCCAGAAATTGGGATGCCATTGACATTCCTCAATCATGCATGTTTTCTGAGTAATGTGTC  
AC140773.20 AGGCCGTGATTTGTTTACACCCAGGAGGCTTAGCCAGAGATTGGGATGCCATTGACATTCCTCAATCATGCATGTTTTCTGAGTAATATACC  
AC140720.21 AGGCCGTGATTTGTTTACACCCAGGAGGCTTAGCCAGAGATTGGGATGCCATTGACATTCCTCAATCATGCATGTTTTCTGAGTAATGTGTC  
AC140550.31 AGGCCGTGATTTGTTTACCCAGGAGGCTTAGCCAGAGATTGGGATGCCATTGACATTCCTCAATCATGCATGTTTTCTGAGTAATGTGTC  
AC139313.11 AGGCCGTATATTTGTTTACACCCAGGAGGCTTAGCCAGAAATTGGGATGCCATTGACATTCCTCAATCATGCATGTTTTCTGAGTAATGTGTC  
AC138527.22 AGGCCGTGATTTGTTTACACCCAGGAGGCTTAGCCAGAGATTGGGATGCCATTGACATTCCTCAATCATGCATGTTTTCTGAGTAATATACC  
AC138133.26 AGGCCCATTTTGTGATACCCAGGAGGCTTAGCCAGAGATTGGGATGCCATTGACATTCCTCAATCATGCATGTTTTCTGAGTAATGTGTC  
AC138012.32 AGGCCGTGATTTGTTTACACCCAGGAGGCTTAGCCAGAAATTGGGATGCCATTGACATTCCTCAATCATGCATGTTTTCTGAGTAATGTGTC  
AC137667.18 AGGCCGTGATTTGTTTACACCCAGGAGGCTTAGCCAGAAATTGGGATGCCATTGACATTCCTCAATCATGCATGTTTTCTGAGTAATGTGTC  
AC135504.47 AGGCCGTGTTTGTGTTTACACCCAGGAGGCTTAGCCAGAGATTGGGATGCCATTGACATTCCTCAATCATGCATGTTTTCTGAGTAATGTGTC  
AC135396.32 AGGCCGTGATTTGTTTACACCCAGGAGGCTTAGCCAGAAATTGGGATGCCATTGACATTCCTCAATCATGCATGTTTTCTGAGTAATGTGTC  
AC134824.36 AGGCCGTATATTTGTTTACACCCAGGAGGCTTAGCCAGAAATTGGGATGCCATTGACATTCCTCAATCATGCATGTTTTCTGAGTAATGTGTC  
AC133864.32 AGGCCGTGATTTGTTTACACCCAGGAGGCTTAGCCAGAGATTGGGATGCCATTGACATTCCTCAATCATGCATGTTTTCTGAGTAATGTGTC  
AC130802.36 AGACCTGCAATTTGTTTACACCCAGGAGGCTTAGCCAGAAATTGGGATGCCATTGACATTCCTCAATCATGCATGTTTTCTGAGTAATGTGTC  
AC127018.25 AGGCCGTGATTTGTTTACACCCAGGAGGCTTAGCCAGAAATTGGGATGCCATTGACATTCCTCAATCATGCATGTTTTCTGAGTAATGTGTC  
AC122728.32 AGGCCGTGATTTGTTTACACCCAGGAGGCTTAGCCAGAAATTGGGATGCCATTGACATTCCTCAATCATGCATGTTTTCTGAGTAATGTGTC  
AC121246.28 AGGCCGTGATTTGTTTACACCCAGGAGGCTTAGCCAGAAATTGGGATGCCATTGACATTCCTCAATCATGCATGTTTTCTGAGTAATGTGTC  
AC121234.33 AGGCCGTGATTTGTTTACACCCAGGAGGCTTAGCCAGAGATTGGGATGCCATTGACATTCCTCAATCATGCATGTTTTCTGAGTAATATACC

1  
donor splice site

CT573400.6 TGCTTGTCTTTTGTGTTTTACTT-----TTAAGAAAACCTCTTTCGTTTTGCCCAAGCGAAAGTGAATCAT---GTAGGGCT  
AC146664.33 TGCTTGTCTTTTGTGTTTTG-----TTTTAAGAAAACCTCTTTCGTTCT-GCCCAAGCGAAAGTGAATCAT---GTAGGGCT  
AC146590.25 TGCTTGTCTTTTGTGTTTTT-----TAAGAAAACCTCTTTCGTTCT-GCCCAAGCGAAAGTGAATCAT---GTAGGGCT  
AC145061.27 TGCTTGTCTTTTGTGTTTTT-----TTTTAAGAAAACCTCTTTCGTTCT-GCCCAAGCGAAAGTGAATCAT---GTAGGGCT  
AC135311.13 TGCTTGTCTTTTGTGTTTTTGTGTTTTTTAGAAAACCTCTTTCGTTCT-GCCCAAGCGAAAGTGAATCAT---GTAGGGCT  
AC151524.2 TGCTT-----TTTTGTGTTTT-----TTAAGAAAACCTCTTTCGTTCT-ACCCAGAGCGAAGTGAATCCT---GTAGGG-T  
AC149496.23 TGCTT-----TTTTGTGTTTT-----TTTAGAAAACCTCTTTCGTTCT-ACCCAGAGCGAAAGTGAATCCT---GTAGGG-T  
AC147001.42 TGCTT-----TTT-GTGTTTTCT-----TTAAGAAAACCTCTTTCGTTCT-ACCCAGAGCGAAAGTGAATCCT---GTAGGG-T  
AC144591.10 TTGTTTCGTCTTTTATGTTTT-----AAGAAAATCCTTTCGTTCT-GCCCAAGCGAAGTGAATCCT---GTAGGGCT  
AC138465.22 TGCTT-----TTT-GTGTTTT-T-----TTAAGAAAACCTCTTTCGTTCT-ACCCAGAGCGAAAGTGAATCCT---GTAGGG-T  
CR936328.1 TGCTTAGTTTATGCTTTTCTTTTC-----AAAAAAAACAAACAAA-ATCCTTTCGCCCGCCCAAGCG---AAAGTGAA  
TGCTTAGTTTATGCTTTTCTTTTC-----AAAAAAAACAAACAAA-ATCCTTTCGCCCGCCCAAGCG---AAAGTGAA  
AC157980.14 TGCTTAGTTTATGCTTTTCTTTTC-----AAAAAAAACCTTTCGTTCT-GCCCAAGCGAAAGTGAATCCT---GTAGGGCT  
AC151742.9 TGCTTAGTTTATGCTTTTCTTTTC-----AAAAAAAACAAACAAA-ATCCTTTCGCCCGCCCAAGCG---AAAGTGAA  
AC148171.16 TGCTTAGTTTATGCTTTTCTTTTC-----AAAAAAAACCTTTCGTTCT-GCCCAAGCGAAAGTGAATCCT---GTAGGGCT  
AC146971.16 TGCTTAGTTTATGCTTTTCTTTTC-----AAAAAAAACAAACAAAT-CTTTCGCCCGCCCAAGCGAAT---GTAGGGCT  
AC146856.8 TGCTAAGTTTATGCTTTTCTTTTC-----AAAAAAAACATCCTTTCGTTCT-CCGCCCAAGCGAAAGTGAATCCT---GTAGGG  
AC146789.30 -----  
AC144656.12 TTATTCGTATTTTATGCTTTTT-----AAGAAAATCCTTTCGTTCT-GCCCAAGCGAAAGTGAATCCT---GTAGGGTT  
AC144345.18 TGCTTAGTTTATGCTTTTCTTTTC-----AAAAAATCCTTTCGTTCT-GCCCAAGCGAAAGTGAATCCT---GTAGGGCT  
AC130806.58 TGCTTAGTTTATGCTTTTCTTTTC-----AAAAAATCCTTTCGTTCT-GCCCAAGCGAAAGTGAATCCT---GTAGGGCT  
AC129090.22 TTGTTTGTCTTTTATGCTTTTTTA-----AAGAAAATCCTTTCGTTCT-GCCCAAGCGAAAGTGAATCCT---GTAGGGCT  
CR962135.1 TTGTTGCTTGAAGTACTTTGTTTT-----CAAAA-TAACAAATCCTCTCGCTCT-GCCCAAGCGAGAGTGATATTTT---CTGTAAGGGC  
CR962122.2 TTGTTGCTTAAAGTACTTTGTTTT-----CAAAA-TAACAAATCCTCTCGCTCT-GCCCAAGCGAGAGTGATATTTT---CTGTAAGGGC  
CR936945.2 TTGTTGCTTTAAGTCTTTGTTTT-----CAAAA-TAACAAATCCTCTCGCTCT-GCCCAAGCGAGAGTGATATTTT---CTGTAAGGGC  
CR932962.2 TTGTTGCTTTAATGCTTTGTTTT-----CAAAA-TAACAAATCCTCTCGCTCT-GCCCAAGCGAGAGTGATATTTT---CTGTAAGGGC  
CR932959.2 TTGTTGCTTTAATGCTTCGTTTT-----CAAAA-TAACATCCTCTCGCTCT-GCCCAAGCGAGAGTGATATTTT---CTGTAAGGGC  
CR931743.1 TTGTTGCTTTAAGTCTTTGTTTT-----CAAAA-TAACAAATCCTCTCGCTCT-GCCCAAGCGAAGTGATATTTT---CTGTAAGGGC  
CR931740.2 TTGTTGCTTTAAGTCTTTGTTTT-----CAAAA-TAACAAATCCTCTCGCTCT-GCCCAAGCGAAGTGATATTTT---CTGTAAGGGC  
CR954230.1 TTGTTGCTTTAAGTCTTTGTTTT-----CAAAA-TAACAAATCCTCTCGCTCT-GCCCAAGCGAGAGTGATATTTT---CTGTAAGGGC  
CT573505.1 TTGTTGCTTTAAGTCTTTGTTTT-----CAAAA-TAACAAATCCTCTCGCTCT-GCCCAAGCGAGAGTGGTATTTT---CTGTAAGGGC  
CT030245.8 TTGTTGCTTTAATGCTTTGTTTT-----CAAAA-TAACAAATCCTCTCGCTCT-GCCCAAGCGAGAGTGATATTTT---CTGTAAGGGC  
CT025480.2 TTGTTGCTTTAATGCTTTGTTTT-----CAAAA-TAACAAATCCTCTCGCTCT-GCCCAAGCGAGAGTGATATTTT---CTGTAAGGGC  
CT010518.7 TTGTTGCTTTAATGCTTTGTTTT-----CAAAA-TAACAAATCCTCTCGCTCT-GCCCAAGCGAGAGTGATATTTT---CTGTAAGGGC  
CT009749.1 TTGTTGCTTTAATGCTTTGTTTT-----CAAAA-TAACAAATCCTCTCGCTCT-GCCCAAGCGAGAGTGATATTTT---CTGTAAGGGC  
CT009565.10 TTGTTGCTTTAAGTCTTTGTTTT-----CAAAA-TAACAAATCCTCTCGCTCT-GCCCAAGCGAGAGTGATATTTT---CTGTAAGGGC  
CT009528.9 TTGTTGCTTTAATGCTTTGTTTT-----CAAAA-TAACAAATCCTCTCGCTCT-GCCCAAGCGAGAGTGATATTTT---CTGTAAGGGC  
CT009511.9 TTGTTGCTTTAAGTCTTTGTTTT-----CAAAA-TAACAAATCCTCTCGCTCT-GCCCAAGCGAGAGTGATATTTT---CTGTAAGGGC  
AC174468.2 TTGTTGCTTTAAGTCTTTGTTTT-----CAAAA-TAACAAATCCTCTCGTTCT-GCCCAAGCGAGAGTGATATTTT---CTGTAAGGGC  
AC174378.9 TTGTTGCTTTAAGTACTTTGTTTT-----CAAAA-TAACAAATCCTCTCGCTCT-GCCCAAGCGAGAGTGATATTTT---CTGTAAGGGC  
AC169177.4 TTGTTGCTTTAATATCTTTGTTTT-----CAAAA-TAACAAATCCTCTCGCTCT-GCCCAAGCGAGAGTGATATTTT---CTGTAAGGGC  
AC162277.25 TTGTTGCTTTAATGCTTTGTTTT-----CAAAA-TAACAAATCCTCTCGCTCT-GCCCAAGCGAGAGTGATATTTT---CTGTAAGGGC  
AC159185.11 TTGTTGCTTTAATGCTTTGTTTT-----CAAAA-TAACAAATCCTCTCGCTCT-GCCCAAGCGAGAGTGATATTTT---CTGTAAGGGC  
AC156629.26 TTGTTGCTTTAAGTCTTTGTTTT-----CAAAA-TAACAAATCCTCTCGCTCT-GCCCAAGCGAGAGTGATATTTT---CTGTAAGGGC  
AC155891.2 TTGTTGCTTTAAGTCTTTGTTTT-----CAAAA-TAACAAATCCTCTCGCTCT-GCCCAAGCGAAGTGATATTTT---CTGTAAGGGC  
AC155100.17 TTGTTGCTTTAAGTACTTTGTTTT-----CAAAA-TAACAAATCCTCTCGCTCT-GCCCAAGCGAGAGTGATATTTT---CTGTAAGGGC  
AC151822.29 TTGTTGCTTTAAGTACTTTGTTTT-----CAAAA-TAACAAATCCTCTCGCTCT-GCCCAAGCGAGAGTGATATTTT---CTGTAAGGGC  
AC151725.26 TTGTTGCTTTAAGTACTTTGTTTT-----CAAAA-TAACAAATCCTCTCGCTCT-GCCCAAGCGAGAGTGATATTTT---CTGTAAGGGC  
AC151673.24 TTGTTGCTTTAAGTCTTTGTTTT-----CAAAA-TAACAAATCCTCTCGCTCT-GCCCAAGCGAGAGTGATATTTT---CTGTAAGGGC  
AC151459.30 TTGTTGCTTTAAGTCTTTGTTTT-----CAAAA-TAACAAATCCTCTCGCTCT-GCCCAAGCGAAGTGATATTTT---CTGTAAGGGC  
AC150445.24 TTGTTGCTTTAATGCTTTGTTTT-----CAAAA-TAACAAATCCTCTCGCTCT-GCCCAAGCGAGAGTGATATTTT---CTGTAAGGGC  
AC149496.23 TTGTTGCTTTAAGTCTTTGTTTT-----CAAAA-TAACAAATCCTCTCGCTCT-GCCCAAGCGAGAGTGATATTTT---CTGTAAGGGC  
AC149404.2 TTGTTGCTTTAAGTATTTTCTTTT-----CAAAA-TAACAAATCCTCTCGCTCT-GCCCAAGCGAGAGTGATATTTT---CTGTAAGGGC  
AC149040.2 TTGTTGCTTTAATGCTTTGTTTT-----CAAAA-TAACATCCTCTCGCTCT-GCCCAAGCGAGAGTGATATTTT---CTGTAAGGGC  
AC146709.11 TTGTTGCTTTAATGCTTTGTTTT-----CAAAA-TAACAAATCCTCTCGCTCT-GCCCAAGCGAGAGTGATATTTT---CTGTAAGGGC  
AC145512.33 TTGTTGCTTTAATGCTTTGTTTT-----CAAAA-TAACATCCTCTCGCTCT-GCCCAAGCGAGAGTGATATTTT---CTGTAAGGGC  
AC145061.27 TTGTTGCTTTAAGTACTTTGTTTT-----CAAAA-TAACAAATCCTCTCGCTCT-GCCCAAGCGAGAGTGATATTTT---CTGTAAGGGC  
AC144930.20 TTGTTGCTTTAAGTACTTTGTTTT-----CAAAA-TAACAAATCCTCTCGCTCT-GCCCAAGCGAGAGTGATATTTT---CTGTAAGGGC  
AC144727.11 TTGTTGCTTTAATGCTTTGTTTT-----CAAAA-TAACAAATCCTCTCGCTCT-GCCCAAGCGAGAGTGATATTTT---CTGTAAGGGC  
AC144727.11 TTGTTGCTTTAAGTGTTTTGT-----CAAAA-TAACAAATCCTCTCGCTCT-GCCCAAGCGAAGTGATATTTT---CTGTAAGGGC  
AC144658.33 TTGTTGCTTTAAGTGTCTTTGTTTT-----CAAAA-TAACAAATCCTCTCGCTCT-GCCCAAGCGAAGTGATATTTT---CTGTAAGGGC  
AC144405.29 TTGTTGCTTTAATGCTTTGTTTT-----CAAAA-TAACAAATCCTCTGCTCT-GCCCAAGCGAGAGTAACTTTT---CTGTAAGGGC  
AC140913.25 TTGTTGCTTTAAGTCTTTGTTTT-----CAAAA-TAACAAATCCTCTCGCTCT-GCCCAAGCGCAATGATATTTT---CTGTAAGGGC  
AC140773.20 TTGTTGCTTTAAGTACTTTGTTTT-----CAAAA-TAACAAATCCTCTCGCTCT-GCCCAAGCGAGAGTGATATTTT---CTGTAAGGGC  
AC140720.21 TTGTTGCTTTAATGCTTTGTTTT-----CAAAA-TAACAAATCCTCTCGCTCT-GCCCAAGCGAGAGTGATATTTT---CTGTAAGGGC  
AC140550.31 TTGTTGCTTTAATGCTTTGTTTT-----CAAAA-TAACAAATCCTCTCGCTCT-GCCCAAGCGAGAGTGATATTTT---CTGTAAGGGC  
AC139313.11 TTGTTGCTTTAAGTCTTTGTTTT-----CAAAA-TAACAAATCCTCTCGCTCT-GCCCAAGCGAGAGTGATATTTT---CTGTAAGGGC  
AC138527.22 TTGTTGCTTTAAGTACTTTGTTTT-----CAAAA-TAACAAATCCTCTCGCTCT-GCCCAAGCGAGAGTATGATATTTT---CTAAGGGC  
AC138133.26 TTGTTGCTTTAAGTACTTTGTTTT-----CAAAA-TAACAAATCCTCTCGCTCT-GCCCAAGCGAAGTGATATTTT---CTGTAAGGGC  
AC138012.32 TTGTTGCTTTAATGCTTTGTTTT-----CAAAA-TAACAAATCCTCTCGCTCT-GCCCAAGCGAGAGTGATATTTT---CTGTAAGGGC  
AC137667.18 TTGTTGCTTTAATGCTTTGTTTT-----CAAAA-TAACAAATCCTCTCGCTCT-GCCCAAGCGAGAGTGATATTTT---CTGTAAGGGC  
AC135504.47 TTGTTGCTTTAAGTGTTTTGT-----CAAAA-TAACAAATCCTCTCGCTCT-GCCCAAGCGAAGTGATATTTT---CTGTAAGGGC  
AC135396.32 TTGTTGCTTTAAGTCTTTGTTTT-----CAAAA-TAACAAATCCTCTCGCTCT-GCCCAAGCGAGAGTGATATTTT---CTGTAAGGGC  
AC134824.36 TTGTTGCTTTAAGTCTTTGTTTT-----CAAAA-TAACAAATCCTCTCGCTCT-GCCCAAGCGAGAGTGATATTTT---CTGTAAGGGC  
AC133864.32 TTGTTGCTTTAAGTCTTTGTTTT-----CAAAA-TAACAAATCCTCTCGCTCT-GCCCAAGCGAGAGTGATATTTT---CTGTAAGGGC  
AC130802.36 TTGTTGCTTTAATGCTTTGTTTT-----CAAAA-TAACAAATCCTCTCGCTCT-GCCCAAGCGAGAGTGATATTTT---CTGTAAGGGC  
AC127018.25 TTGTTGCTTTAAGTCTTTGTTTT-----CAAAA-TAACAAATCCTCTCGCTCT-GCCCAAGCGAGAGTGATATTTT---CTGTAAGGGC  
AC122728.32 TTGTTGCTTTAATGCTTTGTTTT-----CAAAA-TAACAAATCCTCTCGCTCT-GCCCAAGCGAGAGTGATATTTT---CTGTAAGGGC  
AC121246.28 TTGTTGCTTTAATGCTTTGTTTT-----CAAAA-TAACAAATCCTCTCGCTCT-GCCCAAGCGAGAGTGATATTTT---CTGTAAGGGC  
AC121234.33 TTGTTGCTTTAAGTACTTTGTTTT-----CAAAA-TAACAAATCCTCTCGCTCT-GCCCAAGCGAGAGTGATATTTT---CTGTAAGGGC

CT573400.6 TTGCTT-----TGCTTACAGTAT-TTTTATTATGAATGAAAAAT----CGCGTTTCTGTCACGGCATTATTTATTTTTTTT  
AC146664.33 TTGT-TT-----TGCTTCTAGTAC-TTTT-ATTACAAATAAAAAAT----CGTCGTTTCTATCACGGCTTTTATTACTTTTTATT  
AC146590.25 TTGT-TT-----TGCTTCTAGTAC-TTTT-ATTACAAATAAAAAAT----CGTCGTTTCTATCACGGCTTTTATTACTTTTTATT  
AC145061.27 TTGT-TT-----TGCTTCTAGTAC-TTTT-ATTACAAATAAAAAAT----CGTCGTTTCTATCACGGCTTTTATTACTTTTTATT  
AC135311.13 TTGT-TT-----TGCTTCTAGTAC-TTTT-ATTACAAATAAAAAAT----CGTCGTTTCTTTCCAGCGCTTTTATTACTTTTTATT  
AC151524.2 TTGTTTT-----TGCTTTGAGTTTATTTTCAGTATTAATGAAAAAT----TGTCGTTTCTGTCACGGCCGTATT-----TTATT  
AC149496.23 TTGTTTT-----TGCTTTGAGTTTGTTTTCAGTATTAATGAAAAAT----TGTCGTTTCTGTCACGGCCGTATT-----TTATT  
AC147001.42 TTGTTTT-----TACTTTGAGTTTGTTTTCAGTATTGATGAAAAAT----TGTCGTTTCTGTCACGACTGTATT-----TTATT  
AC144591.10 TTTTGCT-----TCAAGAATTATCATCAATAAAAAATAAAA-----TGTCGTTTGTTC-CCGACTTTTGCCTTGTTTT  
AC138465.22 TTGTTTT-----TACTTTGAGTTTGTTTTCAGTATTAATGAAAAAT----TGTCGTTTCTGTCACGGCCGTATT-----TTATT  
CR936328.1 CTATCT-----AGGCTTTTTATTTTCAGAAATATCATCAATAAAAAATA-----AAATGTCGTTTTT-TTCCCGATGTTTTGTCTCATT  
CR932960.3 GCTTATCTAGGGCTTTTTATTTCAAGAAATATCATCAATAAAAAATAAAA-----CGTCGTTTGTTC-CCGATGTTTTGTCTCATT  
AC157980.14 TTTTATT-----TCAAGAAATATCATCAATAAAAAATAAAA-----TGTCGTTTGTTC-CCGATGTTTTGTCTCATT  
AC151742.9 CTATCT-----AGGCTTTTTATTTTCAGAAATATCATCAATAAAAAATA-----AAATGTCGTTTTT-TTCCCGATGTTTTGTCTCATT  
AC148171.16 TTTTATT-----TCAAGAAATATCATCAATAAAAAATAAAA-----TGTCGTTTGTTC-CCGATGTTTTGTCTCATT  
AC146971.16 ATCTA-----GGGCTTTTTATTTCAAGAAATATCATCAATAAAAAATA-----AACGTCGTTTTT-TCCCGATGTTTTGTCTCATT  
AC146856.8 CTTTT-----TATTTCAAGAAATATCATCAATAAAAAATAAAA-----TGTCGTTTGTTC-CCGATGTTTTGTCTCATT  
AC146789.30 -----  
AC144656.12 TTTTGCT-----TCAAGAATTATCATCAATAAAAAATAAAA-----TGTCGTTTGTTC-CCGACTTTT-GCCTTGTTTT  
AC144345.18 TTTTTTT-----ATTTCAAGAAATATCATCAATAAAAAATAAAA-----TGTCGTTTGTTC-CCGATGTTTTGTCTCATT  
AC130806.58 TTTTA-----TTTCAAGAAATATCATCAATAAAAAATAAAA-----ACGTCGTTTTT-TCCCGATGTTTTGTCTCATT  
AC129090.22 TTTTGCT-----TCAAGAATTATCATCAATAAAAAATAAAA-----TGTCGTTTGTTC-CCGACTTTT-GCCTTACTTT  
CR962135.1 ATGTTTG-----TTTCGGCATTGCCGTT-GATTAATAAAAAATAAAA-----TTGTCGTTTCTTCCAGCAGTGTTCTTTTTAA---  
CR962122.2 ATGTTTG-----TTTCGGCATTGCCGTT-GATTAATAAAAAATAAAA-----TTGTCGTTTCTTCCAGCAGTGTTCTTTTTAA---  
CR936945.2 ATGTTTG-----TTTCGGCATTGCCGTT-GATTAATAAAAAATAAAA-----TTGTCGTTTCTTCCAGCAGTGTTCTTTTTAA---  
CR932962.2 ATGTTTG-----TTTCGGCATTGCCGTT-GATTAATAAAAAATAAAA-----TTGTCGTTTCTTCCAGCAGTGTTCTTTTTAA---  
CR932959.2 ATGTTTG-----TTTCGGCATTGCCGTT-GATTAATAAAAAATAAAA-----TTGTCGTTTCTTCCAGCAGTGTTCTTTTTAA---  
CR931743.1 ATGTTTG-----TTTCGGCATTGCCGTT-GATTAATAAAAAATAAAA-----TTGTCGTTTCTTCCAGCAGTGTTCTTTTTAA---  
CR931740.2 ATGTTTG-----TTTCGGCATTGCCGTT-GATTAATAAAAAATAAAA-----TTGTCGTTTCTTCCAGCAGTGTTCTTTTTAA---  
CT954230.1 CTGTTTG-----TTTCGGCATTGCCGTTGATGAATAAAAAATAAAA-----TGTCGTTTCTTCCAGCAGTGTTCTTTTTAA---  
CT573505.1 ATGTTTG-----TTTCGGCATTGCCGTT-GATTAATAAAAAATAAAA-----TTGTCGTTTCTTCCAGCAGTGTTCTTTTTAA---  
CT030245.8 ATGTTTG-----TTTCGGCATTGCCGTT-GATTAATAAAAAATAAAA-----TTGTCGTTTCTTCCAGCAGTGTTCTTTTTAA---  
ATG025840.2 ATGTTTG-----TTTCGGCATTGCCGTT-GATTAATAAAAAATAAAA-----TTGTCGTTTCTTCCAGCAGTGTTCTTTTTAA---  
CT010518.7 ATGTTTG-----TTTCGGCATTGCCGTT-GATTAATAAAAAATAAAA-----TTGTCGTTTCTTCCAGCAGTGTTCTTTTTAA---  
CT009749.1 ATGTTTG-----TTTCGGCATTGCCGTT-GATTAATAAAAAATAAAA-----TTGTCGTTTCTTCCAGCAGTGTTCTTTTTAA---  
CT009565.10 GTGTTTG-----TTTCGGCATTGCCGTTGATGAATAAAAAATAAAA-----TGTCGTTTCTTCCAGCAGTGTTCTTTTTAA---  
CT009528.9 ATGTTTG-----TTTCGGCATTGCCGTT-GATTAATAAAAAATAAAA-----TTGTCGTTTCTTCCAGCAGTGTTCTTTTTAA---  
CT009511.9 ATGTTTG-----TTTCGGCATTGCCGTT-GATTAATAAAAAATAAAA-----TTGTCGTTTCTTCCAGCAGTGTTCTTTTTAA---  
AC174468.2 GTGTTTG-----TTTCGGCATTGCCGTTGATGAATAAAAAATAAAA-----TGTCGTTTCTTCCAGCAGTGTTCTTTTTAA---  
AC174378.9 ATGTTTG-----TTTCGGCATTGCCGTT-GATTAATAAAAAATAAAA-----TTGTCGTTTCTTCCAGCAGTGTTCTTTTTAA---  
AC169177.4 ATGTTTG-----TTTCGGCATTGCCGTT-GATTAATAAAAAATAAAA-----TTGTCGTTTCTTCCAGCAGTGTTCTTTTTAA---  
AC162277.25 ATGTTTG-----TTTCGGCATTGCCGTT-GATTAATAAAAAATAAAA-----TTGTCGTTTCTTCCAGCAGTGTTCTTTTTAA---  
AC159185.11 ATGTTTG-----TTTCGGCATTGCCGTT-GATTAATAAAAAATAAAA-----TTGTCGTTTCTTCCAGCAGTGTTCTTTTTAA---  
AC156629.26 ATGTTTG-----TTTCGGCATTGCCGTT-GATTAATAAAAAATAAAA-----TTGTCGTTTCTTCCAGCAGTGTTCTTTTTAA---  
AC155891.2 ATGTTTG-----TTTCAGCATGCCGTT--ATTAATAAAAAATAAAA-----TCGTCGTTTTTTTCCAGGCTTTTATTTTTT---  
AC155100.17 ATGTTTG-----TTTCGGCATTGCCGTT-GATTAATAAAAAATAAAA-----TTGTCGTTTCTTCCAGCAGTGTTCTTTTTAA---  
AC151822.29 ATGTTTG-----TTTCGGCATTGCCGTTGATGAATAAAAAATAAAA-----TTGTCGTTTCTTCCAGCAGTGTTCTTTTTAA---  
AC151725.26 ATGTTTG-----TTTCGGCATTGCCGTT-GATTAATAAAAAATAAAA-----TTGTCGTTTCTTCCAGCAGTGTTCTTTTTAA---  
AC151673.24 GTGTTTG-----TTTCGGCATTGCCGTTGATGAATAAAAAATAAAA-----TGTCGTTTCTTCCAGCAGTGTTCTTTTTAA---  
AC151459.30 ATGTTTG-----TTTCGGCATTGCCGTT-GATGAATAAAAAATAAAA-----TTGTCGTTTCTTCCAGCAGTGTTCTTTTTAA---  
AC150445.24 GTGTTTG-----TTTCGGCATTGCCGTTGATGAATAAAAAATAAAA-----T-GTCGTTTCTTCCAGCAGTGTTCTTTTTAA---  
AC149496.23 ATGTTTG-----TTTCGGCATTGCCGTT-GATTAATAAAAAATAAAA-----GTGTCGTTTCTTCCAGCAGTGTTCTTTTTAA---  
AC149040.2 ATGTTTG-----TTTCGGCATTGCCGTT-GATTAATAAAAAATAAAA-----TTGTCGTTTCTTCCAGCAGTGTTCTTTTTAA---  
AC149040.2 ATGTTTG-----TTTCGGCATTGCCGTT-GATTAATAAAAAATAAAA-----TTGTCGTTTCTTCCAGCAGTGTTCTTTTTAA---  
AC146709.11 ATGTTTG-----TTTCGGCATTGCCGTT-GATTAATAAAAAATAAAA-----TTGTCGTTTCTTCCAGCAGTGTTCTTTTTAA---  
AC145512.33 ATGTTTG-----TTTCGGCATTGCCGTT-GATTAATAAAAAATAAAA-----TTGTCGTTTCTTCCAGCAGTGTTCTTTTTAA---  
AC145061.27 ATGTTTG-----TTTCGGCATTGCCGTT-GATTAATAAAAAATAAAA-----TTGTCGTTTCTTCCAGCAGTGTTCTTTTTAA---  
AC144930.20 ATGTTTG-----TTTCGGCATTGCCGTT-GATTAATAAAAAATAAAA-----TTGTCGTTTCTTCCAGCAGTGTTCTTTTTAA---  
AC144727.11 ATGTTTG-----TTTCGGCATTGCCGTT-GATTAATAAAAAATAAAA-----TTGTCGTTTCTTCCAGCAGTGTTCTTTTTAA---  
AC144727.11 ATGTTTG-----TTTCGGCATTGCCGTT--ATTAATAAAAAATAAAA-----TCGTCGTTTCTTCCAGCAGTGTTCTTTTTAA---  
AC144658.33 ATGTTTG-----TTTCGGCATTGCCGTT-GATTAATAAAAAATAAAA-----TTGTCGTTTCTTCCAGCAGTGTTCTTTTTAA---  
AC144405.29 ATGTTTG-----TTTCGGCATTGCCGTT-GATTAATAAAAAATAAAA-----TTGTCGTTTCTTCCAGCAGTGTTCTTTTTAA---  
AC140913.25 GTGTTTG-----TTTCGGCATTGCCGTT-GATTAATAAAAAATAAAA-----T-GTCGTTTCTTCCAGCAGTGTTCTTTTTAA---  
AC140773.20 ATGTTTG-----TTTCGGCATTGCCGTT-GATTAATAAAAAATAAAA-----TTGTCGTTTCTTCCAGCAGTGTTCTTTTTAA---  
AC140720.21 ATGTTTG-----TTTCGGCATTGCCGTT-GATTAATAAAAAATAAAA-----TTGTCGTTTCTTCCAGCAGTGTTCTTTTTAA---  
AC140550.31 ATGTTTG-----TTTCGGCATTGCCGTT-GATTAATAAAAAATAAAA-----TTGTCGTTTCTTCCAGCAGTGTTCTTTTTAA---  
AC139313.11 ATGTTTG-----TTTCGGCATTGCCGTT-GATTAATAAAAAATAAAA-----TTGTCGTTTCTTCCAGCAGTGTTCTTTTTAA---  
AC138527.22 ATGTTTG-----TTTCGGCATTGCCGTT-GATTAATAAAAAATAAAA-----TTGTCGTTTCTTCCAGCAGTGTTCTTTTTAA---  
AC138133.26 GCGTTTG-----TTTCGGCATTGCCGTT-GATGAATAAAAAATAAAA-----TGTCGTTTCTTCCAGCAGTGTTCTTTTTAA---  
AC138012.32 ATGTTTG-----TTTCGGCATTGCCGTT-GATTAATAAAAAATAAAA-----TTGTCGTTTCTTCCAGCAGTGTTCTTTTTAA---  
AC137667.18 ATGTTTG-----TTTCGGCATTGCCGTT-GATTAATAAAAAATAAAA-----TTGTCGTTTCTTCCAGCAGTGTTCTTTTTAA---  
AC135504.47 ATGTTTG-----TTTCGGCATTGCCGTT--ATTAATAAAAAATAAAA-----TCGTCGTTTCTTCCAGGCTTTTATTTTTTT---  
AC135396.32 ATGTTTG-----TTTCGGCATTGCCGTT-GATTAATAAAAAATAAAA-----TTGTCGTTTCTTCCAGCAGTGTTCTTTTTAA---  
AC134824.36 ATGTTTG-----TTTCGGCATTGCCGTT-GATTAATAAAAAATAAAA-----TTGTCGTTTCTTCCAGCAGTGTTCTTTTTAA---  
AC133864.32 ATGTTTG-----TTTCGGCATTGCCGTT-GATTAATAAAAAATAAAA-----TTGTCGTTTCTTCCAGCAGTGTTCTTTTTAA---  
AC130802.36 ATGTTTG-----TTTCGGCATTGCCGTT-GATTAATAAAAAATAAAA-----TTGTCGTTTCTTCCAGCAGTGTTCTTTTTAA---  
AC127018.25 ATGTTTG-----TTTCGGCATTGCCGTT-GATTAATAAAAAATAAAA-----TTGTCGTTTCTTCCAGCAGTGTTCTTTTTAA---  
AC122728.32 ATGTTTG-----TTTCGGCATTGCCGTT-GATTAATAAAAAATAAAA-----TTGTCGTTTCTTCCAGCAGTGTTCTTTTTAA---  
AC121246.28 ATGTTTG-----TTTCGGCATTGCCGTT-GATTAATAAAAAATAAAA-----TTGTCGTTTCTTCCAGCAGTGTTCTTTTTAA---  
AC121234.33 ATGTTTG-----TTTCGGCATTGCCGTT-GATTAATAAAAAATAAAA-----TTGTCGTTTCTTCCAGCAGTGTTCTTTTTAA---



CT573400.6 TTATATATATATTCT---GTGCATTTT-----CTGAAAAAATGGTAATAGAAAAAT---CCGAAAAA---TCAT  
 AC146664.33 TTTTTTGT-----TGCTTTTT-----CTGAAAAAATGGTAATACAAAAAT---CCAAAAAA---TCA  
 AC146590.25 TTTT--GT-----TGCTTTTT-----CTGAAAAAATGGTAATACAAAAAT---CCAAAAAAT---CAT  
 AC145061.27 TTTTTTGT-----TGCTTTTT-----ATGAAAAAATGGTAATACAAAAAT---CCAAAAAAAATCATTCTCTTTT  
 AC135311.13 TTTT--GT-----TGCTTTTT-----CTGAAAAA-TGGTAATACAAAAAT---CCAAAAAA---TCA  
 AC151524.2 TTAG-----TGCTTTTT-----CTGAAAAA-TGGTAATACAAAAA---CCAAAAA---CTG  
 AC149496.23 TTAG-----TGCTTTTT-----CTGAAAAA-TGGTAATACAAAAA---CCAAAAAAA---CTTG  
 AC147001.42 TTAG-----TACTTTTT-----CTGAAAAA-TGGTAATACAAAAA---CCAAAAA---CATG  
 AC144591.10 CTTT-----T-ATGATT-----TTAGAAAAAATGGTAATACAAAAA---CCAAAAAT---A  
 AC138465.22 TTAG-----TGCTTTTT-----CTGAAAAA-TGGTAATACAAAAA---CCAAAAA---CTTG  
 CR936328.1 TTCT-----T-TTATGC-----TTTCTGAAAAGTGGTAATACAAAA---ACCCAGCA---T  
 CR932960.3 CTTT-----T-ATGCTT-----TTCTGAAAAGTGGTAATACAAAA---CCCAACAT---G  
 AC157980.14 CTTT-----T-ATGCTT-----TTCTGAAAAGTGGTAATACAAAA---CCCAACAT---G  
 AC151742.9 TTCT-----T-TTATGC-----TTTCTGAAAAGTGGTAATACAAAA---ACCCAGCA---T  
 AC148171.16 CTTT-----T-ATGCTT-----TTCTGAAAAGTGGTAATACAAAA---CCCAACAT---G  
 AC146971.16 TTTT-----T-ATGCTT-----TTCTGAAAAGTGGTAATACAAAA---CCCAACAT---G  
 AC146856.8 TTTT-----A-TGCTTT-----TCTGAAAAGTGGTAATACAAAA---ACCCAACA---T  
 AC146789.30 -----  
 AC144656.12 CTTT-----T-ATGTTT-----TTAGAAAAAATGGTAATACAAAA---CCAAAAAT---A  
 AC144345.18 CTTT-----T-ATGCTT-----TTCTGAAAAGTGGTAATACAAAA---CCCAACAT---G  
 AC130806.58 CTTT-----T-ATGCTT-----TTCTGAAAAGTGGTAATACAAAA---CCCAACAT---G  
 AC129090.22 CTTT-----T-ATGTTT-----TTAGAAAAA-TGGTAATACAAAA---CCGAAAAT---A  
 CR962135.1 -----TGCTTTTTTT---CCCTTGAAAACAATGGTAATGCCAGAAAAA---CCAAAACATCTG---TATT  
 CR962122.2 -----TACCTTTTTTT---TCCTTGAAAAAATGGTAATGCCAGAAAAA---CCAAAACATCTG---TATT  
 CR936945.2 -----AGTGCTTTTT---CCCTTGAAAACAATGGTAATGCCAGAAAAA---CCAAAACGCTCG---TATT  
 CR932962.2 -----AGTGCTTTTT---CCCTTGAAAACAATGGTAATGCCAGAAAAA---CCAAAACGCTCG---TATT  
 CR932959.2 -----AGTGTTTTTC---CC-TTGAAAACAATGGTAATGCCAGAAAAA---CCAAAACGCTCG---TATT  
 CR931743.1 -----GTGCTTTTT---CTTGAAAAAATGGTAATGCCAGAAAAA---CCAAAACATCTG---TATT  
 CR931740.2 -----AGTGTTTTTT---CCCTTGAAAACAATGGTAATGCCAGAAAAA---CCAAAACGCTCG---TATT  
 CT954230.1 -----AGTGCTTTTT---TCTTGAAAAAATGGTAATGCCAGAAAAA---CCAAAACGCTCG---TATT  
 CT573505.1 -----AGTGCTTTTT---CCCTTGAAAACAATGGTAATGCCAGAAAAA---CCAAAACGCTCG---TATT  
 CT030245.8 -----AGTGCTTTTT---CCCTTGAAAACAATGGTAATGCCAGAAAAA---CCAAAACATTTG---TATT  
 CT025480.2 -----AGTGCTTTTT---CCCTTGAAAACAATGGTAATGCCAGAAAAA---CCAAAACGCTCG---TATT  
 CT010518.7 -----AGTGCTTTTT---CCCTTGAAAACAATGGTAATGCCAGAAAAA---CCAAAACGTTTG---TATT  
 CT009749.1 -----AGTGCTTTTT---TCTTGAAAAAATGGTAATGCCAGAAAAA---CCAAAACGCTCG---TATT  
 CT009565.10 -----AGTGCTTTTT---TCTTGAAAAAATGGTAATGCCAGAAAAA---CCAAAACGCTCG---TATT  
 CT009528.9 -----AGTGCTTTTT---CCCTTGAAAACAATGGTAATGCCAGAAAAA---CCAAAACGCTCG---TATT  
 CT009511.9 -----AGTGCTTTTT---CCCTTGAAAACAATGGTAATGCCAGAAAAA---CCAAAACGCTCG---TATT  
 AC174468.2 -----AGTGCTTTTT---TCTTGAAAAAATGGTAATGCCAGAAAAA---CCAAAACGTTTG---TATT  
 AC174378.9 -----TGCTTTTTTT---CCCTTGAAAAAATGGTAATGCCAGAAAAA---CCAAAACATCTG---TATT  
 AC169177.4 -----GTGCTTTTT---TCCTTGAAAAAATGGTAATGCCAGAAAAA---CCAAAACATCTG---TATT  
 AC162277.25 -----AGTGCTTTTT---CCCTTGAAAACAATGGTAATGCCAGAAAAA---CCAAAACGTTTG---TATT  
 AC159185.11 TT-----AGTGCTTTTT---CCCTTGAAAACAATGGTAATGCCA-----TATT  
 AC156629.26 -----AGTGTTTTTC---CCTTGAAAACAATGGTAATGCCAGAAAAA---CCAAAACGCTCG---TATT  
 AC155891.2 -----AGTGCTTTTT---CCTTGAAAAAATGGTAATGCCAGAAAAA---CCAAAACATCTG---TATT  
 AC155100.17 -----AGTACATTTT---TTCTTGAAAAAATGGTAATGCCAGAAAAA---CCAAAACATTTG---TATT  
 AC151822.29 -----TGCTTTTTTC---CCCTTGAAAAATGGTAATGCCAGAAAAA---CCAAAACATCTG---TATT  
 AC151725.26 -----TGCTTTTTTT---CCCTTGAAAAAATGGTAATGCCAGAAAAA---CCAAAACATCTG---TATT  
 AC151673.24 -----AGTGCTTTTT---TCTTGAAAAAATGGTAATGCCAGAAAAA---CCAAAACGTTTG---TATT  
 AC151459.30 -----AGTGCTTTTT---TCTTGAAAAAATGGTAATGCCAGAAAAA---CCAAAACGCTCG---TATT  
 AC150445.24 -----AGTGCTTTTT---CC-TTGAAAACAATGGTAATGCCAGAAAAA---CCAAAACATCTG---TATT  
 AC149496.23 -----AGTGCTTTTTTC---CCCTTGAAAACAATGGTAATGCCAGAAAAA---CCAAAACGCTCG---TATT  
 AC149040.2 -----TGCTTTTTTC---CC-TTGAAAAAATGGTAATGCTAGAAAAA---CCAAAACATCTA---TATT  
 AC149040.2 -----AGTGCTTTTT---CCCTTGAAAACAATGGTAATGCCAGAAAAA---CCAAAACGCTCG---TATT  
 AC146709.11 -----AGTGCTTTTT---CCCTTGAAAACAATGGTAATGCCAGAAAAA---CCAAAACGTTTG---TATT  
 AC145512.33 -----AGTGCTTTTT---CCCTTGAAAAAATGGTAATGCCAGAAAAA---CCAAAACGCTCG---TATT  
 AC145061.27 -----AGTGCTTTTTTT---CCCTTGAAAACAATGGTAATGCCAGAAAAA---CCAAAACGCTCG---TATT  
 AC144930.20 -----GTACCTTTT---TTCTTGAAAAAATGGTAATGCCAGAAAAA---CCAAAACATCTG---TATT  
 AC144727.11 -----AGTGCTTTTT---CCCTTGAAAACAATGGTAATGCCAGAAAAA---CCAAAACGCTCG---TATT  
 AC144727.11 -----AGTGCTTTTT---CTTGAAAAAATGGTAATGCCAGAAAAA---CCAAAACATCTG---TATT  
 AC144658.33 -----AGTGCTTTTT---CCCTTGAAAACAATGGTAATGCCAGAAAAA---CCAAAACGCTCG---TATT  
 AC144405.29 -----AGTGTTTTTT---CCCTTGAAAACAATGGTAATGCCAGAAAAA---CCAAAACGCTCG---TATT  
 AC140913.25 -----AGTGCTTTTT---TC-TTGAAAAAATGGTAATGCCAGAAAAA---CCAAAACGTTTG---TATT  
 AC140773.20 -----AGTGCTTTTTTT---CTTGAAAAAATGGTAATGCCAGAAAAA---CCAAAACATCTG---TATT  
 AC140720.21 -----AGTGCTTTTT---CCCTTGAAAACAATGGTAATGCCAGAAAAA---CCAAAACGTTTG---TATT  
 AC140550.31 -----AGTGCTTTTT---CCCTTGAAAACAATGGTAATGCCAGAAAAA---CCAAAACGTTTG---TATT  
 AC139313.11 -----AGTGCTTTTT---CCCTTGAAAACAATGGTAATGCCAGAAAAA---CCAAAACGCTCG---TATT  
 AC138527.22 -----AGTACCTTTTT---TTCTTGAAAAAATGGTAATGCCAGAAAAA---CCAAAATATCTG---TATT  
 AC138133.26 -----AGTGCTTTTT---TCTTGAAAAAATGGTAATACAGAAAAA---CCAAAACATCTG---TATT  
 AC138012.32 TTTTTTTTTTTTTTTT---AGTGCTTTTT---CCCTTGAAAACAATGGTAATGCCAGAAAAA---CCAAAACGCTCG---TATT  
 AC137667.18 -----AGTGCTTTTTTT---CCCTTGAAAACAATGGTAATGCCAGAAAAA---CCAAAACGCTCG---TATT  
 AC135504.47 -----AGTGCTTTTTTT---CCTTGAAAAAATGGTAATGCCAGAAAAA---CCAAAACATCTG---TATT  
 AC135396.32 -----AGTGCTTTTTTT---CCCTTGAAAACAATGGTAATGCCAGAAAAA---CCAAAACGCTCG---TATT  
 AC134824.36 -----AGTGCTTTTTTT---CCCTTGAAAACAATGGTAATGCCAGAAAAA---CCAAAACGCTCG---TATT  
 AC133864.32 -----AGTGCTTTTTTT---CCCTTGAAAACAATGGTAATGCCAGAAAAA---CCAAAACGCTCG---TATT  
 AC130802.36 -----AGTGCTTTTTTT---CCCTTGAAAACAATGGTAATGCCAGAAAAA---CCAAAACGCTCG---TATT  
 AC127018.25 -----AGTGCTTTTTTT---CCCTTGAAAACAATGGTAATGCCAGAAAAA---CCAAAACGCTCG---TATT  
 AC122728.32 -----GGTGCTTTTTTT---CCCTTGAAAACAATGGTAATGCCAGAAAAA---CCAAAACGCTCG---TATT  
 AC121246.28 -----AGTGCTTTTTTTT---CCCTTGAAAACAATGGTAATGCCAGAAAAA---CCAAAACGCTCG---TATT  
 AC121234.33 -----AGTGCTTTTTTT---TCTTGAAAAAATGGTAATGCCAGAAAAA---CCAAAACATCTG---TATT

CT573400.6 TCTCTTTTCTTTTAAAT-----T-----TTCAAAATCAAAGGTCTGCATTACTCAT-----AAAATCA  
 AC146664.33 TTCTCTTTTCTTTTAAA-----T-----TTCAAACCAAAGGTCTGCATTACTCAT-----AAAATCG  
 AC146590.25 TCTTTTCTTTTAAA-----T-----TTCAAACCAAAGGTCTGCATTACTCAT-----AAAATCA  
 AC145061.27 TTTTCTTTCTTTTAAA-----T-----TTCAAACCAAAGGTCTGCATTACTCAT-----AAAATCA  
 AC135311.13 TTCTCTTTTCTTTTAAA-----T-----TTCAAACCAAAGGTCTGCATTACTCAT-----AAAATCA  
 AC151524.2 TTCTCTTTTCTTTTAAAA-----AAAATCAATTTCAAAGGTCTGCATTACTCTTTTGTAAAAAA--TCA  
 AC149496.23 TTCTCTTTTCTTTTAAATAA-----TATACATCAATTTCAAAGGTCTGCATTACTCTTTTACTAAAAAA--TCA  
 AC147001.42 TTCTCTTTTCTTTTAAAAA-----TATATATCAATTTCAAAGGTCTGCATTACTCTTTTACTAAAAAA--TCA  
 AC144591.10 -----TAATCACCTTCT-----A-----AAAATCTGCATTACTTATTTCTAAAA--TCA  
 AC138465.22 TTCTCTTTTCTTTTAAAAA-----TATATATCAATTTCAAAGGTCTGCATTACTCTTTTACTAAAAAA--TCA  
 CR936328.1 -----GAATTTTCAAAA-----A-----ATCTGCATGTATCTTTCTTCTAAAA--TCA  
 CR932960.3 -----AATTTTCAAAA-----A-----TCTGCATGTATCTTTTCTAAAA--TCA  
 AC157980.14 -----AATCTTCAAAA-----A-----TCTGCATGTATCTTTTCTAAAA--TCA  
 AC151742.9 -----GAATTTTCAAAA-----A-----ATCTGCATGTATCTTTCTTCTAAAA--TCA  
 AC148171.16 -----AATTTTCAAAA-----A-----ATCTGCATGTATCTTTTCTAAAA--TCA  
 AC146971.16 -----AATTTTCAAAA-----A-----ATCTGCATGTATCTTTCTTCTAAAA--TCA  
 AC146856.8 -----AAATTTTCAAAA-----A-----TCTGCATGTATCTTTTCTAAAA--TCA  
 AC146789.30 -----TAATCA-----A-----ATCTGCATGTATCTTTTCTAAAA--TCA  
 AC144656.12 -----TAATCA-----A-----ATCTGCATGTATCTTTTCTAAAA--TCA  
 AC144345.18 -----AATTTTCAAAA-----A-----ATCTGCATGTATCTTTTCTAAAA--TCA  
 AC130806.58 -----AATTTTCAAAA-----A-----ATCTGCATGTATCTTTCTTCTAAAA--TCA  
 AC129090.22 -----TAATCACCTTCT-----A-----AAAATCTGCATTACTTGTTTCTAAAAAA--TCA  
 CR962135.1 TTCTCTTATTAATTCA-----AAAATCTGCATAAAAA-----CTCTTTCTAAAA--TCA  
 CR962122.2 TTCTCTTATTAATTCA-----AAAATCTGCATAAAAA-----CTCTTTCTAAAA--TCA  
 CR936945.2 TTCTCTTATTAATTCA-----AAAATCTGCATAAAAA-----CTCTTTCTAAAA--TCA  
 CR932962.2 TTCTCTTATTAATTCA-----AAAATCTGCATAAAAA-----CTCTTTCTAAAA--TCA  
 CR932959.2 TTCTCTTATTAATTCA-----AAAATCTGCATAAAAA-----CTCTTTCTAAAA--TCA  
 CR931743.1 TTCTCTTATTAATTCA-----AAAATCTGCATAAAAA-----CTCTTTCTAAAA--TCA  
 CR931740.2 TTCTCTTATTAATTCA-----AAAATCTGCATAAAAA-----CTCTTTCTAAAA--TCA  
 CT954230.1 TTCTCTTATTAATTCA-----AAAATCTGCATAAAAA-----CTCTTTCTAAAA--TCA  
 CT573505.1 TTCTCTTATTAATTCA-----AAAATCTGCATAAAAA-----CTCTTTCTAAAA--TCA  
 CT030245.8 TTCTCTTATTAATTCA-----AAAATCTGCATAAAAA-----CTCTTTCTAAAA--TCA  
 CT025840.2 TTCTCTTATTAATTCA-----AAAATCTGCATAAAAA-----CTCTTTCTAAAA--TCA  
 CT010518.7 TTCTCTTATTAATTCA-----AAAATCTGCATAAAAA-----CTCTTTCTAAAA--TCA  
 CT009749.1 TTCTCTTATTAATTCA-----AAAATCTGCATAAAAA-----CTCTTTCTAAAA--TCA  
 CT009565.10 TTCTCTTATTAATTCA-----AAAATCTGCATAAAAA-----CTCTTTCTAAAA--TCA  
 CT009528.9 TTCTCTTATTAATTCA-----AAAATCTGCATAAAAA-----CTCTTTCTAAAA--TCA  
 CT009511.9 TTCTCTTATTAATTCA-----AAAATCTGCATAAAAA-----CTCTTTCTAAAA--TCA  
 AC174468.2 TTCTCTTATTAATTCA-----AAAATCTGCATAAAAA-----CTCTTTCTAAAA--TCA  
 AC174378.9 TTCTCTTATTAATTCA-----AAAATCTGCATAAAAA-----CTCTTTCTAAAA--TCA  
 AC169177.4 TTCTCTTATTAATTCA-----AAAATCTGCATAAAAA-----CTCTTTCTAAAA--TCA  
 AC162277.25 TTCTCTTATTAATTCA-----AAAATCTGCATAAAAA-----CTCTTTCTAAAA--TCA  
 AC159185.11 TCCTCTTATTAATTCA-----AAAATCTGCATAAAAA-----CTCTTTCTAAAA--TCA  
 AC156629.26 TTCTCTTATTAATTCA-----AAAATCTGCATAAAAA-----CTCTTTCTAAAA--TCA  
 AC155891.2 TTCTCTTATTAATTCA-----AAAATCTGCATAAAAA-----CTCTTTCTAAAA--TCA  
 AC155100.17 TTCTCTTATTAATTCA-----AAAATCTGCATAAAAA-----CTCTTTCTAAAA--TCA  
 AC151822.29 TTCTCTTATTAATTCA-----AAAATCTGCATAAAAA-----CTCTTTCTAAAA--TCA  
 AC151725.26 TTCTCTTATTAATTCA-----AAAATCTGCATAAAAA-----CTCTTTCTAAAA--TCA  
 AC151673.24 TTCTCTTATTAATTCA-----AAAATCTGCATAAAAA-----CTCTTTCTAAAA--TCA  
 AC151459.30 TTCTCTTATTAATTCA-----AAAATCTGCATAAAAA-----CTCTTTCTAAAA--TCA  
 AC150445.24 TTCTCTTATTAATTCA-----AAAATCTGCATAAAAA-----CTCTTTCTAAAA--TCA  
 AC149496.23 TTCTCTTATTAATTCA-----AAAATCTGCATAAAAA-----CTCTTTCTAAAA--TCA  
 AC149040.2 TTCTCTTATTAATTCA-----AAAATCTGCATAAAAA-----CTCTTTCTAAAA--TCA  
 AC149040.2 TTCTCTTATTAATTCA-----AAAATCTGCATAAAAA-----CTCTTTCTAAAA--TCA  
 AC146709.11 TTCTCTTATTAATTCA-----AAAATCTGCATAAAAA-----CTCTTTCTAAAA--TCA  
 AC145512.33 TTCTCTTATTAATTCA-----AAAATCTGCATAAAAA-----CTCTTTCTAAAA--TCA  
 AC145061.27 TTCTCTTATTAATTCA-----AAAATCTGCATAAAAA-----CTCTTTCTAAAA--TCA  
 AC144930.20 TTCTCTTATTAATTCA-----AAAATCTGCATAAAAA-----CTCTTTCTAAAA--TCA  
 AC144727.11 TTCTCTTATTAATTCA-----AAAATCTGCATAAAAA-----CTCTTTCTAAAA--TCA  
 AC144658.33 TTCTCTTATTAATTCA-----AAAATCTGCATAAAAA-----CTCTTTCTAAAA--TCA  
 AC144405.29 TTCTCTTATTAATTCA-----AAAATCTGCATAAAAA-----CTCTTTCTAAAA--TCA  
 AC140913.25 TTCTCTTATTAATTCA-----AAAATCTGCATAAAAA-----CTCTTTCTAAAA--TCA  
 AC140773.20 TTCTCTTATTAATTCA-----AAAATCTGCATAAAAA-----CTCTTTCTAAAA--TCA  
 AC140720.21 TTCTCTTATTAATTCA-----AAAATCTGCATAAAAA-----CTCTTTCTAAAA--TCA  
 AC140550.31 TTCTCTTATTAATTCA-----AAAATCTGCATAAAAA-----CTCTTTCTAAAA--TCA  
 AC139313.11 TTCTCTTATTAATTCA-----AAAATCTGCATAAAAA-----CTCTTTCTAAAA--TCA  
 AC138527.22 TTCTCTTATTAATTCA-----AAAATCTGCATAAAAA-----CTCTTTCTAAAA--TCA  
 AC138133.26 TTCTCTTATTAATTCA-----AAAATCTGCATAAAAA-----CTCTTTCTAAAA--TCA  
 AC138012.32 TTCTCTTATTAATTCA-----AAAATCTGCATAAAAA-----CTCTTTCTAAAA--TCA  
 AC137667.18 TTCTCTTATTAATTCA-----AAAATCTGCATAAAAA-----CTCTTTCTAAAA--TCA  
 AC135504.47 TTCTCTTATTAATTCA-----AAAATCTGCATAAAAA-----CTCTTTCTAAAA--TCA  
 AC135396.32 TTCTCTTATTAATTCA-----AAAATCTGCATAAAAA-----CTCTTTCTAAAA--TCA  
 AC134824.36 TTCTCTTATTAATTCA-----AAAATCTGCATAAAAA-----CTCTTTCTAAAA--TCA  
 AC133864.32 TTCTCTTATTAATTCA-----AAAATCTGCATAAAAA-----CTCTTTCTAAAA--TCA  
 AC130802.36 TTCTCTTATTAATTCA-----AAAATCTGCATAAAAA-----CTCTTTCTAAAA--TCA  
 AC127018.25 TTCTCTTATTAATTCA-----AAAATCTGCATAAAAA-----CTCTTTCTAAAA--TCA  
 AC122728.32 TTCTCTTATTAATTCA-----AAAATCTGCATAAAAA-----CTCTTTCTAAAA--TCA  
 AC121246.28 TTCTCTTATTAATTCA-----AAAATCTGCATAAAAA-----CTCTTTCTAAAA--TCA  
 AC121234.33 TTCTCTTATTAATTCA-----AAAATCTGCATAAAAA-----CTCTTTCTAAAA--TCA



CT573400.6 GGCTATGATAGAGGAGGATGAGGAGATTCCTGATGAGATTAATGGATGTTGG-AAACAAGAAAAGAAACAAATTCAGCCTCATCAGGAAG  
AC146664.33 GGCTGTTGGCAGAGGAAAGTGAAGGAGATCCCGAATGAGATCAATGGATGTTGG-AAACAAGAAAAGAAACAAATTCAGCCTCATCAGGAGG  
AC146590.25 GGCTGTTGGCAGAGGAGGATGAGGAGATCCCGAATGAGATCAATGGATGTTGG-AAACAAGAAAAGAAACAAATTCAGCCTCATCAGGAGG  
AC145061.27 GGCTGTTGGCAGAGGAGGATGAGGAGATCCCGAATGAGATCAATGGATGTTGG-AAACAAGAAAAGAAACAAATTCAGCCTCATCAGGAGG  
AC135311.13 GGCTGTTGGCAGAGGAGGATGAGGAGATCCCGAATGAGATCAATGGATGTTGG-AAACAAGAAAAGAAACAAATTCAGCCTCATCAGGAGG  
AC151524.2 AGCTTTGGGTAGAGAGGATGAAGAGATCCCGATGAGTCCCGATGGATGTTAG-AGCAAGAAAAGAAAGCCTTTCAGCCTCACAGGAAG  
AC149496.23 GGCTTTGGGTAGAGAGGATGAAGAGATTCCCGATGAGTCCCGATGGATGTTAG-AGCAAGAAAAGAAAGCCTTTCAGCCTCACAGGAAG  
AC147001.42 AGCTTTGGATAGAGAGGATGAAGAGATTCCCGATGAGTCCCGATGGATGTTAG-AGCAAGAAAAGAAAGCCTTTCAGCCTCACAGGAAG  
AC144591.10 GGCCGAAGAAGAGAGAACGAAGAGATCCCGACGAAATCTCCGGTACTTTG-AGCAAGAAAAGAAAGATCATTTCAGCCTTTCAGGGAAG  
AC138465.22 AGCTTTGGGTAGAGAGGACGAGGAGATTCCCGATGAGTCCCGATGGATGTTAG-AGCAAGAAAAGAAAGCCTTTCAGCCTCACAGGAAG  
CR936328.1 AGCCGGAAGAGAGAGAAATGAAGAGATCCCTGACGAAATCTCTCGACTACTCG-AAACAAGAGAGAAAGCATTTCAGCCTTTCAGGGAAGC  
AC157980.14 AGCCGGAAGAGAGAGAAATGAAGAGATCCCTGACGAAATCTCTCGACTACTCG-AAACAAGAGAGAAAGCATTTCAGCCTTTCAGGGAAGC  
AC151742.9 AGCCGGAAGAGAGAGAAATGAAGAGATCCCTGACGAAATCTCTCGACTACTCG-AAACAAGAGAGAAAGCATTTCAGCCTTTCAGGGAAGC  
AC148171.16 AGCCGGAAGAGAGAGAAATGAAGAGATCCCTGACGAAATCTCTCGACTACTCG-AAACAAGAGAGAAAGCATTTCAGCCTTTCAGGGAAGC  
AC146971.16 GGCCGAAGAAGAGAGAAATGAAGAGATCCCTGACGAAATCTCTCGACTACTCG-AAACAAGAAAAGAAAGCATTTCAGCCTTTCAGGGAAGC  
AC146856.8 GGCCGAAGAAGAGAGAAATGAAGAGATCCCTGACGAAATCTCTCGACTACTCG-AAACAAGAGAGAAAGCATTTCAGCCTTTCAGGGAAGC  
AC146789.30 GGCCGAAGAAGAGAGAAATGAAGAGATCCCTGACGAAATCTCTCGACTACTCG-AAACAAGAGAGAAAGCATTTCAGCCTTTCAGGGAAGC  
AC144656.12 GGCCGAAGAAGAGAGAACGAAGAGATCCCGACGAAATCTCTCGACTACTTTG-AAACAAGAAAAGAAAGCATTTCAGCCTTTCAGGGAAG  
AC144345.18 AACGGGAGAGAGAGAAATGAAGAGATCCCTGACGAAATCTCTCGACTACTCG-AAACAAGAGAGAAAGCATTTCAGCCTTTCAGGGAAGC  
AC130806.58 GGCCGAAGAAGAGAGAAATGAAGAGATCCCTGACGAAATCTCTCGACTACTCG-AAACAAGAGAGAAAGCATTTCAGCCTTTCAGGGAAGC  
AC129090.22 GGCCGAAGAAGAGAGAAATGAAGAGATTTCCGACGAAATCTCCCGCTACTTTG-AAACAAGAAAAGAAAGCATTTCAGCCTTTCAGGGAAG  
CR962135.1 AGCCGAAGATGAGGAAGGTGAGGACATACCATATGAGATCACTCGGTTACTTTG-AAACAAGAAAAGAAAGCATTTCAGCCTCACAGGAAG  
CR962122.2 AGCCGAAGATGAGGAAGGTGAATGATATACCATACGAGATCACCGGCTACTTTG-AGCAAGAAAAGAAAGCATTTCAGCCTCACCAAGAAG  
CR936945.1 AGCCGAAGATGAGGAAGGTGATGACATACCGTATGAGATCACTCGGTTACTTTG-AGCAAGAAAAGAAAGCATTTCAGCCTCACCAAGAAG  
CR932962.2 AGCCGAAGATGAGGAAGGTGATGACCTACCATATGAGATTAATCCTCGGTTACTTTG-AGCAAGAAAAGAAAGCATTTCAGCCTCACAGGAAG  
CR932959.2 AGCCGAAGATGAGGAAGGTGATGACATACCGTATGAGATTAATCCTCGGTTACTTTG-AGCAAGAAAAGAAAGCATTTCAGCCTCACAGGAAG  
CR931743.1 GGCCGAAGATGAGGAAGGTGATGACATACCATATGAGATCACTCGGTTACTTTG-AGCAAGAAAAGAAAGCATTTCAGCCTCACAGGAAG  
CR931740.2 AGCCGAAGATGAGGAAGGTGATGACATACCGTATGAGATTAATCCTCGGTTACTTTG-AGCAAGAAAAGAAAGCATTTCAGCCTCACAGGAAG  
CT954230.1 AGCCGAAGATGAGGAAGGTGATGATATACCGTATGAGATCACTCGGTTACTTTG-AGCAAGAAAAGAAAGCATTTCAGCCTCACAGGAAG  
CT573505.1 AGCCGAAGATGAGGAAGGTGACGACATACCATATGAAATCCTCGGTTACTTTG-AGCAAGAAAAGAAAGCATTTCAGCCTCACAGGAAG  
CT030245.8 AGCCGAAGATGAGGAAGGTGATGACATACCGTATGAGATTAATCCTCGGTTACTTTG-AGCAAGAAAAGAAAGCATTTCAGCCTCACAGGAAG  
CT025480.2 AGCCGAAGATGAGGAAGGTGATGACCTACCATATGAGATTAATCCTCGGTTACTTTG-AGCAAGAAAAGAAAGCATTTCAGCCTCACAGGAAG  
CT010518.7 AGCCGAAGATGAGGAAGGTGATGACATACCATATGAGATCACTCGGCTACTTTG-AGCAAGAAAAGAAAGCATTTCAGCCTCACCAAGAAG  
CT009749.1 AGTCGAAGATGAGGAAGGTGATGACATACCATATGAGATCACTCGGTTACTTTG-AGCAAGAAAAGAAAGCATTTCAGCCTCACCAAGAAG  
CT009565.10 AGCCGAAGATGAGGAAGGTGATGACATACCGTATGAGATCACTCGGTTACTTTG-AGCAAGAAAAGAAAGCATTTCAGCCTCACAGGAAG  
CT009528.9 AGCCGAAGATGAGGAAGGTGATGACATACCATATGAGATTAATCCTCGGTTACTTTG-AGCAAGAAAAGAAAGCATTTCAGCCTCACAGGAAG  
CT009511.9 AGCCGAAGATGAGGAAGGTGATGATATACCATATGAGATTAATCCTCGGTTACTTTG-AGCAAGAAAAGAAAGCATTTCAGCCTCACCAAGAAG  
AC174468.2 AGCCGAAGATGAGGAAGGTGATGACATACCGTATGAGATCACTCGGTTACTTTG-AGCAAGAAAAGAAAGCATTTCAGCCTCACAGGAAG  
AC174378.9 AGCCGAAGATGAGGAAGGTGATGACATACCATATGAGATCACTCGGTTACTTTG-AGCAAGAAAAGAAAGCATTTCAGCCTCACAGGAAG  
AC169177.4 GGCCGAAGATGAGGAAGGTGATGACATACCATATGAGATCACTCGGTTACTTTG-AGCAAGAAAAGAAAGTATTTCAGCCTCACAGGAAG  
AC162277.25 AGCCGAAGATGAGGAAGGTGATGACATACCATATGAGATCACTCGGTTACTTTG-AGCAAGAAAAGAAAGCATTTCAGCCTCACAGGAAG  
AC159185.11 AGCCGAAGATGAGGAAGGTGATGACCTACCATATGAGATTAATCCTCGGTTACTTTG-AGCAAGAAAAGAAAGCATTTCAGCCTCACCAAGAAG  
AC156629.26 AGCCGAAGATGAGGAAGGTGATGACATACCATATGAGATTAATCCTCGGTTACTTTG-AGCAAGAAAAGAAAGCATTTCAGCCTCACAGGAAG  
AC155891.2 AGCCGAAGATGAGGAAGGTGATGATATACCATATGAGATCACTCAACTGCTCG-AGCAAGAAAAGAAAGCATTTCAGCCTCACAGGAAG  
AC155100.17 GGCCGAAGATGAGGAAGGTGATGATATACCATATGAGATCACTCGGTTACTTTG-AGCAAGAAAAGAAAGCATTTCAGCCTCACAGGAAG  
AC151822.29 AGCCGAAGATGAGGAAGGTGATGACATACCATATGAGATCACTCGGTTACTTTG-AGCAAGAAAAGAAAGCATTTCAGCCTCACAGGAAG  
AC151725.26 GGCCGAAGATGAGGAAGGTGATGACCTACCATATGAGATCACTCGGTTACTTTG-AGCAAGAAAAGAAAGCATTTCAGCCTCACAGGAAG  
AC151673.24 AGCCGAAGATGAGGAAGGTGATGATATACCATATGAGATTAATCCTCGGTTACTTTG-AGCAAGAAAAGAAAGCATTTCAGCCTCACAGGAAG  
AC151459.30 AGCCGAAGATGAGGAAGGTGATGACATACCATATGAGATCACTCGGTTACTTTG-AGCAAGAAAAGAAAGCATTTCAGCCTCACAGGAAG  
AC150445.24 AGCCGAAGATGAGGAAGGTGATGACATACCATATGAGATTAATCCTCGGTTACTTTG-AGCAAGAAAAGAAAGCATTTCAGCCTCACCAAGAAG  
AC149496.23 AGCCGAAGATGAGGAAGGTGATGACATACCGTATGAGATCACTCGGTTACTTTG-AGCAAGAAAAGAAAGCATTTCAGCCTCACCAAGAAG  
AC149040.2 GGCCGAAGATGAGGAAGGTGATGACATACCATATGAGATCACTCGGTTACTTTG-AGCAAGAAAAGAAAGCATTTCAGCCTCACAGGAAG  
AC149040.2 AGCCGAAGATGAGGAAGGTGATGACATACCGTATGAGATCACTCGGTTACTTTG-AGCAAGAAAAGAAAGCATTTCAGTCTCACCAAGAAG  
AC146709.11 AGCCGAAGATGAGGAAGGTGATGACATACCATATGAGATTAATCCTCGGTTACTTTG-AGCAAGAAAAGAAAGCATTTCAGCCTCACAGGAAG  
AC145512.33 AGCCGAAGATGAGGAAGGTGATGACATACCATATGAGATCACTCGGTTACTTTG-AGCAAGAAAAGAAAGCATTTCAGCCTCACAGGAAG  
AC145061.27 AGCCGAAGATGAGGAAGGTGATGATATACCATATGAGATCACTCGGTTACTTTG-AGCAAGAAAAGAAAGCATTTCAGCCTCACAGGAAG  
AC144930.20 AGCCGAAGATGAGGAAGGTGATGACATACCATATGAGATCACTCGGCTACTTTG-AGCAAGAAAAGAAAGCATTTCAGCCTCACAGGAAG  
AC144727.11 AGCCGAAGATGAGGAAGGTGATGACATACCATATGAGATTAATCCTCGGTTACTTTGAGCAAGAAAAGAAAGCATTTCAGCCTCACAGGAAG  
AC144727.11 AGCCGAAGATGAGGAAGGTGATGACATACCATATGAGATCACTCGACTGCTCG-AAACAAGAAAAGAAAGCATTTCAGCCTCACAGGAAG  
AC144658.33 AGCCGAAGATGAGGAAGGTGATGACATACCATATGAGATCACTCGGTTACTTTG-AGCAAGAAAAGAAAGCATTTCAGCCTCACAGGAAG  
AC144405.29 AGCCGAAGATGAGGAAGGTGATGACCTACCATATGAGATTAATCCTCGGTTACTTTG-AGCAAGAAAAGAAAGCATTTCAGCCTCACCAAGAAG  
AC140913.25 AGCCGAAGATGAGGAAGGTGATGACATACCATATGAGATTAATCCTCGGTTACTTTG-AGCAAGAAAAGAAAGCATTTCAGCCTCACCAAGAAG  
AC140773.20 GGCCGAAGATGAGGAAGGTGATGACATACCATATGAAATCCTCGGTTACTTTG-AGCAAGAAAAGAAAGCATTTCAGCCTCACAGGAAG  
AC140720.21 AGCCGAAGATGAGGAAGGTGATGACATACCGTATGAGATTAATCCTCGGTTACTTTG-AGCAAGAAAAGAAAGCATTTCAGCCTCACAGGAAG  
AC140550.31 AGCCGAAGATGAGGAAGGTGATGACATACCATATGAGATCACTCGGTTACTTTG-AGCAAGAAAAGAAAGCATTTCAGCCTCACAGGAAG  
AC139313.11 AGCCGAAGATGAGGAAGGTGATGACATACCGTATGAGATCACTCGGTTACTTTG-AGCAAGAAAAGAAAGCATTTCAGTCTCACCAAGAAG  
AC138527.22 AGCCGAAGATGAGGAAGGTGATGATATACCATATGAGATCACTCGGCTACTTTG-AGCAAGAAAAGAAAGCATTTCAGCCTCACAGGAAG  
AC138133.26 AGCTGAAGATGAGAAAGTGA---CATACCATATGAGATCACTCGGTTACTTTG-AGCAAGAAAAGAAAGCATTTCAGCCTCACCAAGAAG  
AC138012.32 AGCCGAAGATGAGGAAGGTGATGATATACCATATGAGATTAATCCTCGGTTACTTTG-AGCAAGAAAAGAAAGCATTTCAGTCTCACCAAGAAG  
AC137667.18 AGCCGAAGATGAGGAAGGTGATGACATACCATATGAGATTAATCCTCGGTTACTTTG-AGCAAGAAAAGAAAGCATTTCAGCCTCACAGGAAG  
AC135504.47 AGCCGAAGATGAGGAAGGTGATGACATACCATATGAGATCACTCGACTTCTCG-AGCAAGAAAAGAAAGCATTTCAGCCTCACAGGAAG  
AC135396.32 AGCCGAAGATGAGGAAGGTGATGACATACCGTATGAGATCACTCGGTTACTTTG-AGCAAGAAAAGAAAGCATTTCAGCCTCACCAAGAAG  
AC134824.36 AGCCGAAGATGAGGAAGGTGATGACATACCGTATGAGATCACTCGGTTACTTTG-AGCAAGAAAAGAAAGCATTTCAGCCTCACCAAGAAG  
AC133864.32 AGCCGAAGATGAGGAAGGTGATGACATACCATATGAGATCACTCGGCTACTTTG-AGCAAGAAAAGAAAGCATTTCAGCCTCACAGGAAG  
AC130802.36 AGCCGAAGATGAGGAAGGTGATGACCTACCATATGAGATTAATCCTCGGTTACTTTG-AGCAAGAAAAGAAAGCATTTCAGCCTCACCAAGAAG  
AC127018.25 AGCCGAAGATGAGGAAGGTGATGACATACCGTATGAGATCACTCGGTTACTTTG-AGCAAGAAAAGAAAGCATTTCAGCCTCACCAAGAAG  
AC122728.32 AGCCGAAGATGAGGAAGGTGATACATACCGTATGAGATTAATCCTCGGTTACTTTG-AGCAAGAAAAGAAAGCATTTCAGCCTCACAGGAAG  
AC121246.28 AGCCGAAGATGAGGAAGGTGATGACATACCATATGAGATTAATCCTCGGTTACTTTG-AGCAAGAAAAGAAAGCATTTCAGCCTCACAGGAAG  
AC121234.33 AGCCGAAGATGAGGAGGTGATGACATACCGTATGAGATCACTCGGTTACTTTG-AGCAAGAAAAGAAAGCATTTCAGCCTCACAGGAAG



CT573400.6 TTGAGCTTCTCAGAGAATATGCTGATATATTTGCATGGTCATACAAAGGACATGCCGGGTCTAGACCCTGATGTCGTGGAACACAGATTGC  
AC146664.33 TTGAGCTTATCAGAGAATATGTTGATATATTCGCATGGTCATACAAAGACATGCCGGGTCTAGACCCTGATGTCGTGGAACACAGACTAC  
AC146590.25 TTGAGCTTATCAGAGAATATGTTGATATATTCGCATGGTCATACAAAGACATGCCGGGTCTAGACCCTGATGTCGTGGAACACAGACTAC  
AC145061.27 TTGAGCTTATCAGAGAATATGTTGATATATTCGCATGGTCATACAAAGACATGCCGGGTCTAGACCCTGATGTCGTGGAACACAGACTAC  
AC135311.13 TTGAGCTTATCAGAGAATATGTTGATATATTCGCATGGTCATACAAAGACATGCCGGGTCTAGACCCTGATGTCGTGGAACACAGACTAC  
AC151524.2 TTGAGCTTCTCAGAGAGTATGATGATATATTTGCATGGTCCTACAAAGACATGCCGGGTCTAGACCCTGATGTCGTGGAACACCGTTTGC  
AC149496.23 TTGAGCTTCTCAGAGAGTATGATGATATATTTGCATGGTCCTACAAAGACATGCCGGGTCTAGACCCTGATGTCGTGGAACACCGTTTGC  
AC147001.42 TTGAGCTTCTCAGAGAGTATGATGATATATTTGCATGGTCCTACAAAGACATGCCGGGTCTAGACCCTGATGTCGTGGAACACCGTTTGC  
AC144591.10 TTGAGCTTCTCAGAGAGTATGATGATATATTTGCATGGTCCTACAAAGACATGCCGGGTCTAGACCCTGATGTCGTGGAACACCGTTTGC  
AC138465.22 TTGAGCTTCTCAGAGAGTATGATGATATATTTGCATGGTCCTACAAAGACATGCCGGGTCTAGACCCTGATGTCGTGGAACACCGTTTGC  
CR936328.1 TTGAGCTCCTCAAAGAAATATGTTGATGTTGTCCTGGTCCTACCAAGATATGCCGGGTCTAGACCCTGATGTCGTGGAACACCGTTTGC  
CR932960.3 TTGAGCTCCTCAAAGAAATATGTTGATGTTGTCCTGGTCCTACCAAGATATGCCGGGTCTAGACCCTGATGTCGTGGAACACCGTTTGC  
AC157980.14 TTGAGCTTCTCAAAGAAATATGTTGATGTTGTCCTGGTCCTACCAAGATATGCCGGGTCTAGACCCTGATGTCGTGGAACACCGTTTGC  
AC151742.9 TTGAGCTCCTCAAAGAAATATGTTGATGTTGTCCTGGTCCTACCAAGATATGCCGGGTCTAGACCCTGATGTCGTGGAACACCGTTTGC  
AC148171.16 TTGAGCTCCTCAAAGAAATATGTTGATGTTGTCCTGGTCCTACCAAGATATGCCGGGTCTAGACCCTGATGTCGTGGAACACCGTTTGC  
AC146971.16 TTGAGCTCCTCAAAGAAATATGTTGATGTTGTCCTGGTCCTACCAAGATATGCCGGGTCTAGACCCTGATGTCGTGGAACACCGTTTGC  
AC146856.8 TTGAGCTCCTCAAAGAAATATGTTGATGTTGTCCTGGTCCTACCAAGATATGCCGGGTCTAGACCCTGATGTCGTGGAACACCGTTTGC  
AC146789.30 TTGAGCTCCTCAAAGAAATATGTTGATGTTGTCCTGGTCCTACCAAGATATGCCGGGTCTAGACCCTGATGTCGTGGAACACCGTTTGC  
AC144656.12 TTGAGCTTCTCAAAGAA-----AC--AGATATGTC--CCTCAA-----TTGTTGATACACCTTTTAC  
AC144345.18 TTGAGCTCCTCAAAGAAATATGTTGATGTTGTCCTGGTCCTACCAAGATATGCCGGGTCTAGACCCTGATGTCGTGGAACACCGTTTGC  
AC130806.58 TTGAGCTCCTCAAAGAGTATGTTGATGTTGTCCTGGTCCTACCAAGATATGCCGGGTCTAGACCCTGATGTCGTGGAACACCGTTTGC  
AC129090.22 TTGAGCTTCTCAAAGAAATATGTTGATGTTGTCCTGGTCCTACCAAGATATGCCGGGTCTAGACCCTGATGTCGTGGAACACCGTTTGC  
CR962135.1 TCCAACCTCCTCCGGGAATATCCGGATATTTTTGCATGGTCGTATGAAGATATGCCAGGTCTAGATCCCTATGATTTGGAGCATCGGATCC  
CR962122.2 TCCAACCTCCTCCGGGAATATCCGGATATTTTTGCATGGTCGTATGAAGATATGCCAGGTCTAGATCCCTATGATTTGGAGCATCGGATCC  
CR936945.2 TCCAACCTCCTCCGGGAATATCCGGATATTTTTGCATGGTCGTATGAAGATATGCCAGGTCTAGACCCTATGATCGTGGAGCATCGGATCC  
CR932962.2 TCCAACCTCCTCCGGGAATATCCGGATATTTTTGCATGGTCGTATGAAGATATGCCAGGTCTAGACCCTATGATCGTGGAGCATCGGATCC  
CR932959.2 TCCAACCTCCTCCGGGAATATCCGGATATTTTTGCATGGTCGTATGAAGATATGCCAGGTCTAGACCCTATGATCGTGGAGCATCGGATCC  
CR931743.1 TCCAACCTCCTCCGGGAATATCCGGATATTTTTGCATGGTCGTATGAAGATATGCCAGGTCTAGACCCTATGATTTGGAGCATCGGATCC  
CR931740.2 TCCAGCTCCTCCGGGAATATCCGGATATTTTTGCATGGTCGTATGAAGATATGCCAGGTCTAGACCCTATGATTTGGAGCATCGGATCC  
CT954230.1 TCCAGCTCCTCCGGGAATATCCGGATATTTTTGCATGGTCGTATGAAGATATGCCAGGTCTAGACCCTATGATTTGGAGCATCGGATCC  
CT573505.1 TCCAACCTCCTCCGGGAATATCCGGATATTTTTGCATGGTCGTATGAAGATATGCCGGGTCTAGACCCTATGATTTGGAGCATCGGATCC  
CT030245.8 TCCGACTCCTCCGGGAATATCCGGATATTTTTGCATGGTCGTATGAAGATATGCCAGGTCTAGACCCTATGATCGTGGAGCATCGGATCC  
CT025840.2 TCCAACCTCCTCCGGGAATATCCAGATATTTTTGCATGGTCGTATGAAGATATGCCAGGTCTAGACCCTATGATCGTGGAGCATCGGATCC  
CT010518.7 TCCAACCTCCTCCGGGAATATCCGGATATTTTTGCATGGTCGTATGAAGATATGCCAGGTCTAGATCCCTATGATTTGGAGCATCGGATCC  
CT009749.1 TCCAGCTCCTCCGGGAATATCCGGATATTTTTGCATGGTCGTATGAAGATATGCCAGGTCTAGATCCCTATGATCGTGGAGCATCGGATCC  
CT009565.10 TCCAACCTCCTCCGGGAATATCCGGATATTTTTGCATGGTCGTATGAAGATATGCCGGGTCTAGACCCTATGATCGTGGAGCATCGGATCC  
CT009528.9 TCCGACTCCTCCGGGAATATCCGGATATTTTTGCATGGTCGTATGAAGATATGCCAGGTCTAGACCCTATGATTTGGAGCATCGGATCC  
CT009511.9 TCCAACCTCCTCCGGGAATATCCGGATATTTTTGCATGGTCGTATGAAGATATGCCAGGTCTAGACCCTATGATTTGGAGCATCGGATCC  
AC174468.2 TCCAGCTCCTCCGGGAATATCCGGATATTTTTGCATGGTCGTATGAAGATATGCCAGGTCTAGACCCTATGATCGTGGAGCATCGGATCC  
AC174378.9 TCCAACCTCCTCCGGGAATATCCGGATATTTTTGCATGGTCGTATGAAGATATGCCAGGTCTAGATCCCTATGATTTGGAGCATCGGATCC  
AC169177.4 TCCAACCTCCTCCGGGAATATCCGGATATTTTTGCATGGTCGTATGAAGATATGCCAGGTCTAGATCCCTAGATTGGAGCATCGGATCC  
AC162277.25 TCCAACCTCCTCCGGGAATATCCGGATATTTTTGCATGGTCGTATGAAGATATGCCAGGTCTAGATCCCTATGATTTGGAGCATCGGATCC  
AC159185.11 TCCAACCTCCTCCGGGAATATCCGGATATTTTTGCATGGTCGTATGAAGATATGCCAGGTCTAGACCCTATGATCGTGGAGCATCGGATCC  
AC156629.26 TCCAGCTCCTCCGGGAATATCCGGATATTTTTGCATGGTCGTATGAAGATATGCCAGGTCTAGACCCTATGATTTGGAGCATCGGATCC  
AC155891.2 TCCAGCTCCTCCGAGAAATCCAGATATTTTTGCATGGTCGTATGAAGATATGCCAGGTCTAGATCCCTAGATTGGAGAACATCGGATCC  
AC155100.17 TCCAACCTCCTCCGGGAATATCCGAAATATTTTTGCATGGTCGTATGAAGATATGCCAGGTCTAGATCCCTATGATTTGGAGCATCGAATCC  
AC151822.29 TCCAACCTCCTCCGGGAATATCCGGATATTTTTGCATGGTCGTATGAAGATATGCCAGGTCTAGATCCCTATGATTTGGAGCATCGGATCC  
AC151725.26 TCCAACCTCCTCCGGGAATATCCGGACATTTTTGCATGGTCGTATGAAGATATGCCAGGTCTAGATCCCTATGATTTGGAGCATCGGATTC  
AC151673.24 TCCAGCTCCTCCGGGAATATCCGGATATTTTTGCATGGTCGTATGAAGATATGCCAGGTCTAGACCCTATGATCGTGGAGCATCGGATCC  
AC151459.30 TCCAACCTCCTCCGGGAATATCCGGATATTTTTGCATGGTCGTATGAAGATATGCCAGGTCTAGATCCCTATGATTTGGAGCATCGGATCC  
AC150445.24 TCCAACCTCCTCCGGGAATATCCGGATATTTTTGCATGGTCGTATGAAGATATGCCAGGTCTAGACCCTATGATCGTGGAGCATCGGATCC  
AC149496.23 TCCAACCTCCTCCGGGAATATCCGGATATTTTTGCATGGTCGTATGAAGATATGCCAGGTCTAGATCCCTATGATTTGGAGCATCGGATCC  
AC149040.2 TCCAACCTCCTCCGGGAATATCCGGATATTTTTGCATGGTCGTATGAAGATATGTCAGGTCTAGATCCCTATGATTTGGAGAACATCGGATCC  
AC149040.2 TCTAACTCCTCCGGGAATATCCGGATATTTTTGCATGGTCGTATGAAGATATGCCAGGTCTAGACCCTATGATCGTGGAGCATCGGATCC  
AC146709.11 TCCAACCTCCTCCGGGAATATCCGGATATTTTTGCATGGTCGTATGAAGATATGCCAGGTCTAGACCCTATGATCGTGGAGCATCGGATCC  
AC145512.33 TCCAACCTCCTCCGGGAATATCCGGATATTTTTGCATGGTCGTATGAAGATATGCCAGGTCTAGATCCCTATGATTTAGAGCATCGGATCC  
AC145061.27 TCCAACCTCCTCCGGGAATATCCGGATATTTTTGCATGGTCGTATGAAGATATGCCAGGTCTAGACCCTATGATTTGGAGCATCGGATCC  
AC144930.20 TCCAACCTCCTCCGGGAATATCCGGATATTTTTGCATGGTCGTATGAAGATATGTCAGGTCTAGATCCCTATGATTTGGAGCATCGGATCC  
AC144727.11 TCCAACCTCCTCCGGGAATATCCGGATATTTTTGCATGGTCGTATGAAGATATGCCGGGTCTAGACCCTATGATTTGGAGCATCGGATCC  
AC144727.11 TCCAGCTCCTCCGAGAGTATCCGGATATTTTTGCATGGTCGTATGAAGATATGCCAGGTCTAGATCCCTAGATTGGAGAACATCGGATTC  
AC144658.33 TCCAACCTCCTCCGGGAATATCCGGATATTTTTGCATGGTCGTATGAAGATATGCCGGGTCTAGACCCTATGATTTGGAGCATCGGATCC  
AC144405.29 TCCAACCTCCTCCGGGAATATCCGGATATTTTTGCATGGTCGTATGAAGATATGCCAGGTCTAGACCCTATGATTTGGAGCATCGGATCC  
AC140913.25 TCCAACCTCCTCCGGGAATATCCGGATATTTTTGCATGGTCGTATGAAGATATGCCAGGTCTAGACCCTATGATCGTGGAGCATCGGATCC  
AC140773.20 TCCAGCTCCTCCGGGAATATCCGGATATTTTTGCATGGTCGTATGAAGATATGCCAGGTCTAGATCCCTATGATTTAGAGCATCGGATCC  
AC140720.21 TCCAACCTCCTCCGGGAATATCCGGATATTTTTGCATGGTCGTATGAAGATATGCCAGGTCTAGACCCTATGATCGTGGAGCATCGGATCC  
AC140550.31 TCCAGCTCCTCCGGGAATATCCGGATATTTTTGCATGGTCGTATGAAGATATGCCAGGTCTAGATCCCTATGATTTGGAGCATCGGATCC  
AC139313.11 TCCAACCTCCTCCGGGAATATCCGGATATTTTTGCATGGTCGTATGAAGATATGCCAGGTCTAGACCCTATGATCGTGGAGCATTTGGATCC  
AC138527.22 TCCAACCTCCTCCGGGAATATCCGGATATTTTTGCATGGTCGTATGAAGATATGCCAGGTCTAGATCCCTATGATTTGGAGAACATCGGATCC  
AC138133.26 TCCAGCTCCTCCGGGAATATCCGGACATTTTTGCATGGTCGTATGAGGATATGCCAGGTCTAGATCCCTAAATTTGGAGCATCGGATCC  
AC138012.32 TCCAACCTCCTCCGGGAATATCCGGATATTTTTGCATGGTCGTATGAAGATATGCCAGGTCTAGACCCTATGATCGTGGAGCATCGGATCC  
AC137667.18 TCCAGCTCCTCCGGGAATATCCGGATATTTTTGCATGGTCGTATGAAGATATGCCAGGTCTAGACCCTATGATTTGGAGCATCGGATCC  
AC135504.47 TCCAGCTCCTCCGAGAAATCCCGGATATTTTTGCATGGTCGTATGAAGATATGCCAGGTCTAGATCCCTAGATTATGGAACATCGGATCC  
AC135396.32 TCCAACCTCCTCCGGGAATATCCGGATATTTTTGCATGGTCGTATGAAGATATGCCAGGTCTAGACCCTATGATCGTGGAGCATCGGATCC  
AC134824.36 TCCAACCTCCTCCGGGAATATCCGGATATTTTTGCATGGTCGTATGAAGATATGCCAGGTCTAGACCCTATGATCGTGGAGCATCGGATCC  
AC133864.32 TCCAACCTCCTCCAGGAATATCCGGATATTTTTGCATGGTCGTATGAAGATATGCCAGGTCTAGACCCTATGATTTGGAGCATCGGATCC  
AC130802.36 TCCAACCTCCTCCGGGAATATCCGGATATTTTTGCATGGTCGTATGAAGATATGCCAGGTCTAGACCCTATGATCGTGGAGCATCGGATTC  
AC127018.25 TCCAACCTCCTCCGGGAATATCCGGATATTTTTGCATGGTCGTATGAAGATATGCCAGGTCTAGACCCTATGATCGTGGAGCATCGGATCC  
AC122728.32 TCCAACCTCCTCCGGGAATATCCGGATATTTTTGCATGGTCGTATGAAGATATGCCAGGTCTAGACCCTATGATCGTGGAGCATCGGATCC  
AC121246.28 TCCGACTCCTCCGGGAATATCCGGATATTTTTGCATGGTCGTATGAAGATATGCCAGGTCTAGACCCTATGATTTGGAGCATCGGATCC  
AC121234.33 TCCAGCTCCTCCGGGAATATCCGGATATTTTTGCATGGTCGTATGAAGATATGCCAGGTCTAGATCCCTATGATTTGGAGCATCGGATCC
